# Supplementary material for: A major role for noncoding regulatory mutations in the evolution of enzyme activity
Source: PubMed Central journal article supplement — Proc Natl Acad Sci U S A. 2019 May 31;116(25):12383–9. doi: 10.1073/pnas.1904071116 (PMC6589674; doi:10.1073/pnas.1904071116), 2019-05-31
Supplement: pnas.1904071116.sapp.pdf [file pnas.1904071116.sapp.pdf]

## Supplementary Information for

**The evolution of more: A major role for noncoding regulatory mutations in the evolution of enzyme activity**

David W. Loehlin, Jesse R. Ames, Kathy Vaccaro, Sean B. Carroll.

Corresponding author: David W. Loehlin, Sean B. Carroll  
Email: [dwl1@williams.edu](mailto:dwl1@williams.edu), [carrolls@hhmi.org](mailto:carrolls@hhmi.org)

### **This PDF file includes:**

Supplementary text  
Figs. S1 to S7  
Table S1  
References for SI reference citations

## Supplementary Information Text

### Nucleotide-level mapping results of *D. melanogaster* fast/slow.

Fine-scale mapping of the *D. melanogaster* fast and slow alleles uncovered six causative sites (Fig. 5 and S4). These are described in detail below.

**5'-flanking region:** The source of the difference originating from the 5'-flanking region mapped to the nucleotide on the border with the 5'-UTR region; this border is spanned by a multisite substitution (*Adh-slow*: TCACCG, *Adh-fast*: TCATGC). The underline marks the start of the 5'-UTR region; SI Methods). This sequence binds Initiator, a core promoter transcription factor that positions RNA Polymerase II (1).

Since the multisite substitution spans two regions in our five-region map, we designed two constructs in order to tease apart the potential contribution of the initiator and 5'UTR substitutions. One construct recombined 5' of the multisite substitution (construct "X", sequence TCA|TGC, "|" is the recombination breakpoint) while the second construct split the multisite substitution by recombining immediately 5' of the presumed transcription start site (construct "Y", sequence TCAC|GC). ADH activity of "X" and "Y" was found to differ by 17% ( $P < 0.001$ , Figure 5), demonstrating that the C/T substitution in the Initiator binding motif is a causative contributor to the allelic difference. Also, this substitution is sufficient to explain the entire activity difference arising from the 5'-flanking region (Figure 5). Remarkably, a parallel C/T substitution in the same Initiator site distinguishes *D. yakuba* (TCGTGC) from *D. santomea* (TCGCCG).

**5'-UTR region:** This region contributes a 49% difference in activity, the dominant contributor to activity evolution in this lineage (Table 1). Laurie and Stam (2) had implicated an indel polymorphism in the first intron, delta-1, as causative. Our mapping (Fig. 5) confirms the role of delta-1 and reveals the contribution of two additional substitutions: a C/G SNP and the delta-2 indel. All three causative substitutions lie within 100 bp. These are near to, but slightly upstream of, promoter sequences required for larval expression (3), suggesting the presence of a previously undescribed regulatory element.

**Coding region:** One amino acid substitution occurs here, a lysine to threonine at position 192 (K192T) that has been shown to affect ADH activity (4-5). In our mapping experiment, we tested for possible effects of K192T and three other (noncoding) substitutions in this region (Fig. S4B). None of the noncoding substitutions contributed a detectable effect. Therefore, the K192T substitution is sufficient to explain the entirety of the activity difference from the coding region.

**3'-UTR region:** We identified a 10% change in activity due to substitution(s) here, but we were unable to further resolve the responsibility of specific site(s). Two substitutions occur in our pair of alleles: a poly-A tract of length 14 in *slow* and length 15 in *fast*, and a complex substitution of sequence CA in *slow* and G- in *fast*. We attempted to separate the effects of the  $A_{(14)}/A_{(15)}$  from the CA/G- with a construct that was recombined between the two sites. However, activity of this construct was not significantly different from either neighboring construct (Figure S4D), indicating that we did not have sufficient power to determine the causative site(s). In spite of this, we note that Stam and Laurie (6) also mapped an activity difference with a similar effect size of 1.1-fold to a region containing the 3'-UTR. Their *fast* and *slow* haplotypes carry a different suite of substitutions in this region, but the C/G nucleotide substitution is shared in their study and ours. Additional mapping work would be required to determine if this one substitution or if multiple substitutions are responsible for the activity difference from the 3'-UTR.

## Methods.

***Drosophila* strains.** *Adh* loci were PCR amplified and cloned from *D. melanogaster* strains Canton-S (Bloomington Stock Center #64349) and Florida-9 (Bloomington #2374), *D. erecta* (UCSD Stock Center 14021-0224.00), *D. orena* (UCSD 14021-0245.01), *D. yakuba* (UCSD 14021-0261.01), *D. santomea* (UCSD 14021-0271.01), *D. americana* (UCSD 15010-0951.00), *D. virilis* (Bowling Green Stock Center 15010-1051.0, also used in (7)). All transgenes were injected into *D. melanogaster* strain pf86 (7), of genotype y[1] M{vas-int.Dm}ZH-2A w[\*]; Adh[fn6] cn[1]; M{3xP3-RFP.attP}ZH-86Fb. This strain carries the Leu479Phe allele of *Aldehyde Dehydrogenase* (8).

**Engineering recombinant *Adh* loci.** *Adh* locus fragments were PCR amplified and cloned into injection vector pS3aG using steps described below. Site-specific germline transformants were generated using the phiC31 system following the strategy described in (7). One design challenge with such a transgenic approach is that the size of a genetic locus, including all flanking regulatory sequences, can span for hundreds of kilobases in *Drosophila*. We restricted our study to an ~8kb fragment, including the *Adh* transcription unit plus at least 3 kb in either direction. Our constructs did not include a putative larval regulatory element described to be 3-5kb upstream of the promoter (9). It is also possible that additional distant noncoding regulatory elements could contribute to activity divergence. However, initial experiments indicated that most of the divergence in activity was recapitulated by the sequences within the transgenes (Figure 2).

Loci were amplified and cloned as follows. Primers for PCR and sequencing are in Table S1. *D. melanogaster* alleles were amplified using primers S3aAF1/S3aNR1, digested with AscI and NotI-HF (New England Biolabs), and ligated into attB vector pS3aG using the AscI and NotI sites. *D. erecta* and *D. orena* *Adh* loci were amplified in two overlapping fragments using primers S3aAf2/ere5055R and ere4771F/S3aNR1, A-tailed, ligated into pGem-T-Easy, sequenced, then inserted into pS3aG using the flanking AscI and NotI sites plus a conserved

internal *PacI* site to join the left and right halves. A similar approach was used for *D. yakuba* and *D. santomea Adh* loci, but using primers S3aAF2/ere5055R and ere4217F/S3aNR1. The *D. americana* locus was amplified using primers Adh\_vir\_AF1/Adh\_ame\_lhsR2 and Adh\_ame\_rhsF2/Adh\_vir\_NR1 and an internal *BamHI* site. The *D. virilis* tandem duplicate locus was amplified and sequenced as described in (7).

For the *melanogaster* group species, our constructs include the entirety of *Adhr*, a downstream polycistronic ORF present in ~1% of *Adh* transcripts (in the *D. virilis* group, *Adhr* is located on the other side of *outspread*, ~80kb away). ADHR's function is unclear, other than it does not metabolize ethanol (10), and so it was not quantified here. Each locus was sequenced from multiple clones and a clone that perfectly matched the consensus was used for subsequent work. The *D. melanogaster fast* allele was recalcitrant to Sanger sequencing around the palindromic delta-2 sequence, unless we first denatured the template and primer in 1 microliter of 100 mM Tris, 0.1 mM EDTA, pH 8, at 98 C for 5 min, then placed the mixture on ice, and finally added the sequencing reagents and cycled as normal. Sequences are available in Genbank (MH614199-MH614205; *D. virilis*: KU559568.1).

Our initial design intent was to subdivide the gene at the boundaries of the transcript and translational unit. Subsequently, we became aware that a) the *D. melanogaster Adh* transcriptional start site (TSS) was different in different genome databases and b) causative substitutions occurred right on this boundary. Because the TSS location appeared to be ambiguous, and perhaps because many TSS are biologically variable (11), we chose to not make strong inferences about the relative contribution of causative substitutions in untranscribed versus transcribed regions. When generating recombinant alleles, we used the transcription and translation breakpoints from the following published datasets. For *D. melanogaster* (and *melanogaster* group species), we used the gene coordinates of the adult transcript (Adh-RC, Genbank ID NM\_001032095.1) from Flybase Release 5 (12). The TSS of this transcript was called a few nucleotides upstream in Flybase Release 6 (13) and a few nucleotides downstream

in a targeted primer extension assay (1). For *D. virilis* and *D. americana*, we used the transcript boundaries identified by Nurminsky et al. (14).

Recombinant *Adh* alleles were created by PCR and Gibson assembly using the primers in Table S1. Recombination can be done in two directions (e.g., AA and BB can recombine as AB and BA), but for simplicity, we elected to map in only one (arbitrarily chosen) direction. The basic approach was to design primers to the site of the desired breakpoint, amplify the left half of the breakpoint from Species A and the right half from Species B, and assemble these into the pS3aG vector using Gibson Assembly Master Mix or NEBuilder HiFi Master Mix (New England Biolabs). In some cases, to reduce PCR error, we reduced the size of the PCR fragments by assembling into a version of the vector that already contained the appropriate 5' and/or 3' sequence. Amino acid swap alleles were created by incorporating the relevant nucleotide changes into primers for PCR and Gibson assembly. For the *melanogaster* group swaps, we incorporated the “high” amino acids into the “low” allele. Conversely, we swapped the *D. americana* amino acid into the single-copy *D. virilis* locus described below. The transgenic lines of *D. mel slow* allele and “Fast” K192T swap into the *D. mel slow* allele were previously reported in Siddiq et al. (5).

To facilitate recombination mapping between *D. virilis* and *D. americana*, we modified the locus in two ways. First, the *D. virilis Adh* locus occurs in a nearly-identical tandem duplicate of an 8kb region containing the entire promoter and coding sequence. We previously engineered a single-copy version of the *virilis Adh* locus that matches the right-hand copy of the wild-type tandem duplicate (7). This *virilis* single copy allele was used here for recombination mapping of different subregions of the gene between *virilis* and *americana*. Two aspects of the *virilis* tandem duplicate are noted. First, the left and right copies differ by only two nucleotides in the 3'-noncoding region; these were found to have no apparent effect on ADH activity (7). Second, the tandem duplicate allele differs slightly in sequence from the allele in the reference genome, but we found that this allele was present identically in *D. virilis* strains 15010-1051.00 and 1501-

1051.41 by PCR, cloning, and sequencing. For comparisons in this paper, we used the *virilis* single construct.

The second modification was to the *D. americana* construct. This construct was not a precise match to the source locus due to an unstable microsatellite sequence. Specifically, in a plasmid midi-prep of this construct, we noticed variable sizes of the insert when run on a gel after restriction enzyme digestion. PCR and resequencing indicated that a promoter-proximal repeat of [CTCTATA]<sub>n</sub> was variable in size, likely due to slippage as *E. coli* DH5 $\alpha$  replicated the plasmid. Because it was not straightforward to either identify the ‘correct’ length of this repeat (Sanger sequencing of our initial clone suggested that there were 84 repeats) or confidently produce a uniform plasmid preparation of this sequence for injection, we decided to isolate a stable version of this repeat and then control for the possibility that it might influence ADH activity. We isolated a clone that contained a 11-copy repeat [CTCTATA]<sub>11</sub> that was relatively stable in culture, as determined by restriction digest and gel electrophoresis, and used this as the ‘reference’ *D. americana* locus. For recombination mapping, we chose the mapping direction such that most constructs would have *D. virilis* sequence at this locus. In addition, we generated constructs with recombination events immediately proximal and distal to this repeat, so as to determine the contribution of other substitutions in the 5’-noncoding region.

**ADH enzyme assay.** To achieve the large sample sizes required to detect small differences between species and recombinant genotypes, we developed a high throughput implementation of the classic ADH enzyme assay (6). A few experiments presented in this paper (described below) were conducted using early variants of the assay or following a laboratory move. We present these separate experiments as separate plots given the possibility that technical differences (e.g., using a different spectrophotometer or total-protein assay) led to different means. Conversely, data shown in the same plot were all measured concurrently. A description of the typical assay method follows, along with a description of procedural variants conducted in particular experiments.

Flies were cultured under low-crowding conditions on sugar food recipe media at room temperature (20-24°C) in Madison, WI, as described previously (7). 0-1d old males were collected and aged for 4d in food vials, then transferred to a 1mL titer plate on ice. Each well contained one ball bearing and 300 $\mu$ L of 0.1M sodium phosphate buffer + 0.1% Nonidet P-40, pH 8.6. Groups of four flies (from the same vial) were randomly assigned to wells and transferred under CO<sub>2</sub>. After homogenization, the final volume was brought to 800  $\mu$ L (i.e., 200  $\mu$ L per fly). Homogenization was performed in a Mini-G vertical ball-bearing grinder (Spex Sample Prep) for five repetitions of (15s at 1000RPM, 1 min on ice) using an aluminum plate insert (Kryo-Tech, Spex Sample Prep) to keep the homogenate cold. Homogenates were then centrifuged for 10 min at 4000G, and a 200  $\mu$ L aliquot was transferred from the center of the well volume into a 300  $\mu$ L v-bottom microtiter plate at room temperature, from which the enzyme assay and protein assays were loaded.

The ADH enzyme assay protocol is described in detail in (5 and 7). Enzyme substrate concentrations were chosen to be at least twofold higher than those needed to achieve maximum velocity of the most-active allele *Adh-fast*, the *D. melanogaster* allele from FL-9. We used ethanol as the substrate, whereas other studies (e.g., (6)) have used isopropanol, which magnifies the effect of the K192T amino acid substitution. Total protein was measured from 5  $\mu$ L of homogenate in 100  $\mu$ L reagent using the Pierce BCA Kit (Thermo Fisher). Three technical replicate ADH activity measurements and three technical replicate protein measurements, each in separate plates, were performed per sample on a Multiskan GO spectrophotometer (Thermo Fisher).

ADH assay methods varied slightly (described below) as we updated the procedure to be more efficient and moved labs. Qualitatively similar results were observed in pilot studies and in comparison of the same constructs run between method revisions. However, quantitative differences among assay variants are possible, for example as a result of using a more dilute fly homogenate.



**Assay Variant 1:** Along with Variant 2, this was the preferred method variant and is the method described above. Used in experiments shown in Figures 3, 4, 5, S3, S4C, and S4D.

**Assay Variant 2:** The enzyme assay was identical to Assay Variant 1, but flies were raised on Bloomington Recipe media at room temperature of 18°C-21°C in Williamstown, MA. The spectrophotometer used was a Synergy HT (Bio-Tek). This method was used in Figure 2A and also in Figure 1A for *D. melanogaster fast/slow*, *D. yakuba*, and *D. santomea*.

**Assay Variant 3:** Same as Assay Variant 1, except that single flies were homogenized in 250  $\mu$ L of buffer, resulting in a more dilute homogenate. This was an early design of a high-throughput assay using the ball-bearing grinder, and we abandoned it in favor of the more efficient Variant 1 that uses pools of flies. This method was used for the experiment shown in Figure S4B.

**Assay Variant 4:** This early method is described in detail in (7). The primary differences were that five flies were homogenized in Potter-Elvehjem grinders using 1mL of buffer without detergent. *D. virilis* and *D. americana* flies are larger and thus were homogenized as 2 flies in 1 mL buffer to maintain a similar protein concentration. The protein assay used was the Quant-IT Protein assay (Invitrogen). This method was used for Figures 2B and S1. It was also used in Figure 1A for *D. oreana* and *D. erecta* (5 flies per mL) and for *D. virilis* and *D. americana* (2 flies per mL).

Our experiment had the following structure. We set up vials of typically four replicate transgenic lines per construct (exceptions: two lines of *mel* recombinant line E, three of *mel* recombinant line V, three of *vir* single, three of *san*). Wildtype species/populations were considered to have one replicate line. For each line, two replicate vials were set up. We collected and measured replicate day batches from each experiment on several separate days. Six day replicates were collected for most experiments, with the following exceptions: Ten day replicates were collected in the Figure 2B *virilis* experiment, eight for the *virilis* mapping experiment (Figures 3, 4, and S3F), and one for the *D. erecta*-*D. oreana* species comparison (Figure S1). For the *D. melanogaster* fine-scale map, in Figure S4D we processed two replicate fly samples per

vial instead of one as a way of increasing sample size and in Figure S4B we processed one to three replicate fly samples per vial (see also description of Assay Variant 3). We analyzed this structure using a mixed-effects model: `relative ADH activity ~ construct` with random effects of `line`, `day`, `vial within day`, and when relevant, `sample within vial`.

To get an approximate sense of the differences in ADH activity we could detect, we used the `power.t.test` function in R. A typical set of data (yak-san recombinants) had standard error of 0.012, df of 18, alpha of 0.05/6 (Bonferroni correction), and power of 0.9, giving a detectable difference of 0.023. This is 4% of the activity of a high-activity genotype (yak) and 8% of the activity of a low-activity genotype (san).

We excluded outlier data in a few extreme cases. Using this site-specific integration method, we had observed that a fraction of transgenic lines (fewer than one in ten) would show extreme activity values associated with ectopic insertion of the construct. The modest number of replicate lines we recovered per genotype did not allow us to treat such genetic variants as random error. Therefore, after the initial batch was run, we graphically examined the ADH activity values of replicate lines for outliers. We detected and excluded three candidate outliers from our analysis. (1) One of four lines of *erecta-orena* recombinant position 1 had extremely low activity. This was tested with PCR and found to be an ectopic insertion, i.e., the insert could be PCR amplified but the junctions between insert and flanking genomic DNA could not. These data were excluded and a new replicate line of that genotype was used in subsequent batches. (2) One line of *virilis-americana* rec1 showed activity greater than twofold higher than other lines with that construct. We could not detect evidence of ectopic insertion using PCR from a genomic DNA sample from this genotype. Later samples set up from a different culture of that line showed activity similar to other lines of this construct. We suspect that this line was contaminated, such as by mating and introgression of a wildtype (non-null) *Adh*, so we excluded all measurements of this line from analysis. (3) A single sample of *melanogaster* recombinant Q showed activity of about three times the grand mean, but other batches from the same vial were

similar to the consensus. We suspect this was due to sample mishandling and excluded it from analysis.

All enzyme assay data were analyzed in R version 3.3.3 (15) with a linear mixed-effects model (`lme`, package `nlme`) and visualized using `ggplot2`. The mixed-effects models had crossed-factor random effects, which were specified in `lme` using modified syntax (7, 16). Residuals analysis suggested that constructs with higher activity had higher variance, therefore we modified the model to weight variance by `construct`. For each separate experiment, we compared models with unweighted and weighted variance. In each case, the weighted variance model showed lower AIC and was used, with the exception of the early mapping experiment presented in Figure S4B which would converge only with unweighted variance. As a check, we also ran equivalent unweighted models using `lmer` (package `lme4`), which does not allow variance weighting. The `lmer` models yielded identical parameter estimates to the unweighted `lme` models. Residuals and random effects were checked for normality and lack of structure when plotted against fitted values and grouping factors.

Our ultimate goal with this statistical analysis was to compare the mean activity of adjacent recombinant constructs. Once a model had been fit, we performed sequential comparisons (i.e., between constructs with recombination at adjacent positions, or between amino acid swap and the wildtype allele). The `lme` model fits did not properly compute degrees of freedom (DF), so we extracted DF for the equivalent unweighted `lmer` model using `lsmeans` (package `lsmeans`), Satterthwaite method. 95% confidence intervals and p-values for multiple comparison t-tests (`consec` contrasts, `mvt` method) were computed with `lsmeans` on the `lme` model fits, but using the Satterthwaite `df`. In some cases, we wanted to compare non-adjacent constructs. For these, we used P-values from all pairwise comparisons.

**Western Blot.** Relative Adh protein levels were assessed using Western blot and a commercially produced peptide antibody to the *D. melanogaster* Adh (Adh dG-20, SC-22676, Santa Cruz

Biotech). In our hands, this antibody produced low signal relative to background. Antibody binding to other species' Adh proteins was also plausibly affected by amino acid differences in the peptide region, but we note that the amino acid sequences in this region are identical between the pairs of closely related alleles or species planned for comparison in this study (Figure S2). Still, this antibody appeared to consistently detect differences in protein abundance between pairs of species that were consistent with published data on ADH enzyme activity and our own data on ADH enzyme activity.

Lysate was produced by homogenizing 30 *melanogaster* group males or 15 *virilis* group males. Flies were flash frozen in liquid nitrogen in 2mL tubes containing two ball bearings then thawed on ice. 200  $\mu$ L of homogenization buffer was added (10 mM Tris-HCl pH 7.5, 1 mM MgCl<sub>2</sub>, 1% v/v Triton X-100, 0.1% v/v HALT protease inhibitor solution without EDTA (Thermo Fisher), and 1  $\mu$ L/mL Benzonase nuclease (MilliporeSigma). Flies were then homogenized using a Mini-G vertical ball bearing grinder (Spex Sample Prep), grinding for 15s at 1000RPM followed by chilling the tubes 30s on ice, repeated 7 times. Homogenates were centrifuged for 1 minute at 21000g at 4°C to pellet the cuticle. The supernatant was then pipetted into a 200 $\mu$ L PCR tube and incubated at room temperature for 5-15 minutes for nuclease activity. To isolate the soluble protein from nucleic acids and floating lipid, lysates were centrifuged at 21000G at 4°C for 15 minutes, and then the middle aqueous layer was transferred to a new tube. Centrifuging was repeated for an additional 15 minute and 5 minute centrifuge steps to achieve a clear lysate. Lysate protein concentrations were quantified with BCA assay and lysates diluted to equal concentrations. Lysates were run immediately or flash frozen in liquid nitrogen and stored at -20°C.

Lysate was combined with 4x Laemmli sample buffer (Bio-Rad) with equal  $\mu$ g amounts loaded per sample (50 $\mu$ g-80 $\mu$ g) then heat denatured. Proteins were separated on 12% SDS-PAGE gels (Mini-Protean TGX, Bio-Rad) for 120 min at 100V at room temperature. Proteins were wet transferred overnight onto Immobilon-P (Millipore). Blots were dried, stained with Ponceau-S, cut in half below the 37 kDa molecular weight standard, washed, then rewet with

methanol before blocking with 5% w/v powdered milk in TBSTw (0.1M Tris-buffered saline, pH 7.6, 0.1% Tween-20). Primary antibody incubation at 4°C overnight used goat-anti-Adh dG-20 (SC-22676, Santa Cruz Biotech) at 1:250 or rabbit-anti-gamma-tubulin T5192 (MilliporeSigma) at 1:2000 in blocking solution. Blots were then washed 5 times for 10 minutes in TBSTw at room temperature. Secondary antibody incubation used donkey-anti-goat-peroxidase SAB3700330 (MilliporeSigma) at 1:4000 and donkey-anti-rabbit-peroxidase SAB3700978 (MilliporeSigma) at 1:4000 in blocking solution for 1-2h at room temperature. Blots were then washed 5 times for 10 minutes in TBSTw at room temperature, Chemiluminescence images were captured using SuperSignal West Pico Plus reagent (Thermo Fisher) on a G-Box Chemi imager (Syngene). Levels for an image were adjusted uniformly in the G-box software, with no other manipulations.

**Ethanol Resistance Assay.** Flies were cultured on Bloomington recipe media at room temperature (18°C - 21°C) in Williamstown, MA. Four lines per construct with three replicate cultures per line were set up in low crowding conditions. 5-12 males (typically 12) were collected from each culture vial under CO<sub>2</sub> and then aged 4d in food vials. A rayon plug (Flugs For Narrow Glass Vials, Genesee Scientific) was pushed to the bottom of a plastic Drosophila vial (Genesee Scientific). In pilot tests, these plugs made scoring flies much easier since drunk flies would tend to crawl into/under looser absorbent materials such as cotton balls or filter paper. For the assay, vials were assigned a numerical ID from a random sequence to blind the observer. 2 mL of a solution consisting of 3% sucrose and 13%-25% ethanol was applied to the plug and flies were then transferred to these assay vials from the food vials by bumping against a rubber pad. Assay vials were then sealed with another rayon plug, flush with the top of the vial, and capped with a piece of Parafilm to reduce evaporation. Vials were then sorted based on the random sequence. After 24h, the number of incapacitated flies per vial was counted. Assay vials were held horizontally and rapped twice on a rubber pad to knock the flies over, after which the

vial sat still. Flies that were dead or failed to right themselves after 20 seconds were scored as incapacitated.

For this assay, we had three replicate vials per line but six ethanol concentrations (13%-23%, in 2% steps). Assuming that ethanol resistance would increase logistically with ethanol concentration, we grouped our ethanol treatments into blocks following a round-robin design. For each day the experiment was replicated, each construct was exposed to three replicates of all six ethanol concentrations and each line was exposed to three concentrations separated by 4% (either (13%, 17%, 21%) or (15%, 19%, 23%)). The particular concentration applied to each vial rotated with each day replicate, such that each vial was subjected to each ethanol concentration after six day replicates. We conducted two rotations of each ethanol concentration block, for a total of twelve day replicates. In addition, we had also conducted a pilot test consisting of two day replicates under similar conditions but using ethanol concentrations from 15%-25%. Since the assay conditions were otherwise similar to those in the round-robin experiment, we combined the data from this pilot with the full experiment. Ultimately, the sample sizes used were: 14 days, 4 lines, 3 cultures per line; 162-168 ethanol treatments per construct, 1537-1833 flies per construct (mean 1734); 328-486 flies per line (mean 433).

Ethanol resistance data were analyzed in R with a generalized linear mixed model (`glmer`, package `lme4`) with `construct` and `ethanol concentration` as fixed effects and `line` and `day` as random effects. We also tested models including `block` (set of ethanol treatments) as a random effect, or replacing `day` with `block`, but these were found to be equivalent by chi-square test.  $IC_{50}$  means and standard errors were computed from the model fit using the `dose.p.glmm` function from Venables and Ripley (17).

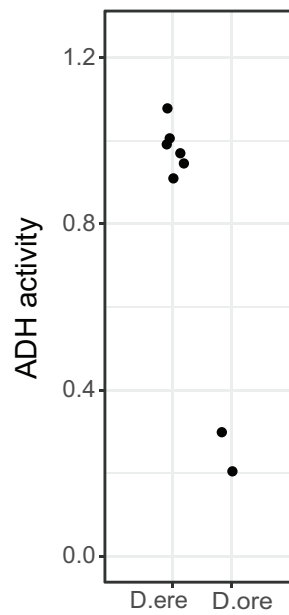

**Figure S1.** *D. oreana* appears to have lower ADH activity than *D. erecta*. Only two replicate samples of *D. oreana* males were obtained due to difficulty with culturing the species, but activity of these was ~3.8-fold lower than *D. erecta*. Mean and SD of these data are also presented in Fig. 1. Activity of *D. erecta* flies shown in Fig. 2A is from a separate experiment that used a different assay protocol.





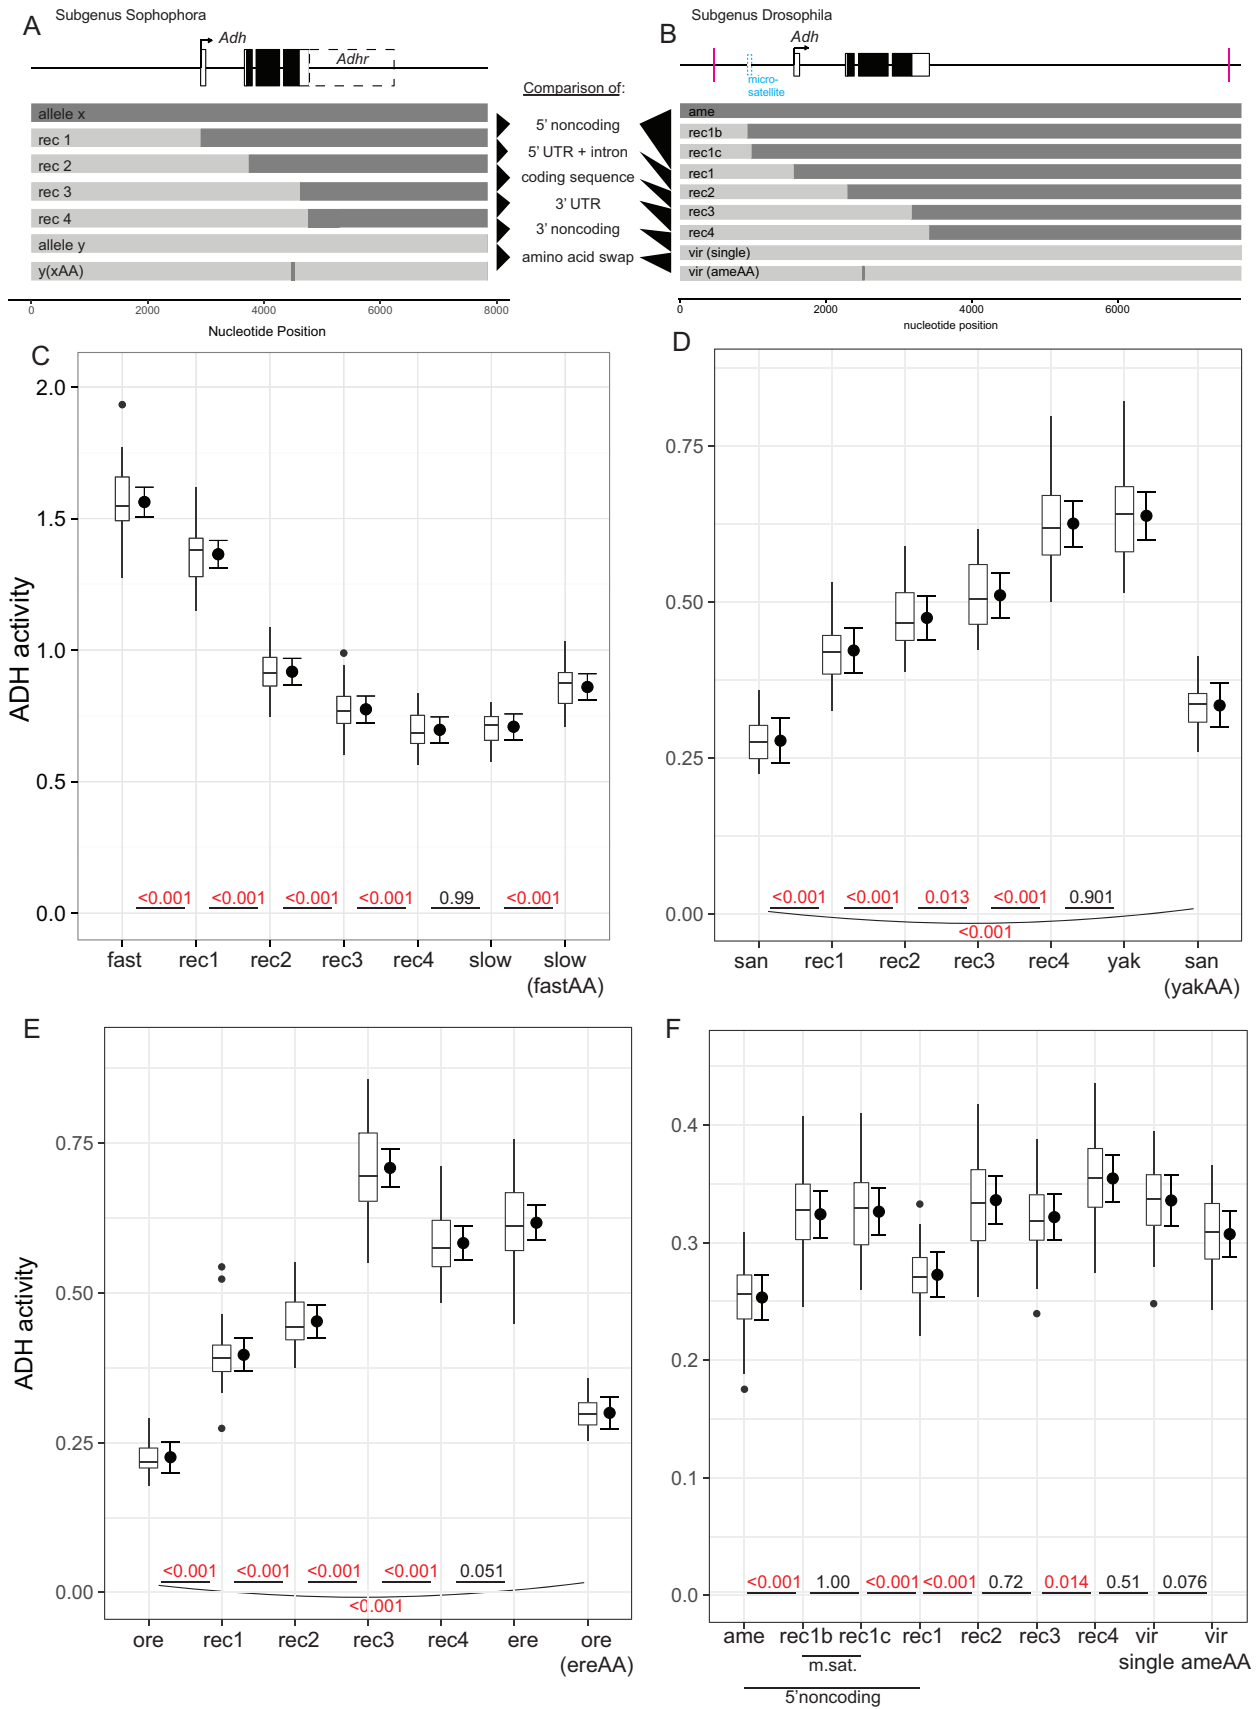

**Figure S3.** Effects of five regions and amino-acid-swaps on ADH enzyme activity for four species pairs. (A) Model of *melanogaster* group *Adh* locus and recombinants used for five-region map. (B) Model of *virilis* group *Adh* locus. Magenta bars show the boundaries of the *D. virilis* tandem duplicate. Cyan box shows the position of the *D. americana* microsatellite. *Adhr* is a separate gene located ~500kb away in this group. (C-F) ADH enzyme activity of transgenic alleles, recombinants, and of swapping the amino acid sequence of one allele into the other allele. Tukey boxplots show distribution of activity measurements and error bars show 95% confidence interval of means. P values and DF are from sequential multiple comparisons between adjacent lines or between an amino-acid swap allele and the unmodified allele (P values for all pairwise multiple comparisons are shown for the same data in Figure 3). Panel C is a subset of the finer-scale mapping experiment presented in Figure 5B. Figure 4 and Table 1 show these data converted into percent differences between adjacent constructs. (F) Mapping within *D. virilis* included additional recombinants *rec1b* and *rec1c* to bypass any contribution of the *D. americana* microsatellite, whose length could not be controlled. These recombinants show no effect of the microsatellite, but instead reveal causative and opposing effects from the left and right sides of the 5'-flanking region.



```

>slow #1 GCGAATAATC AAGACTCAGC ACCAATTTTT AGTTTATGGT CTAGTTCCTT ATAGGTTTTG TACTTCTTTT TTTTCGCTTG GCTATTTTGC GATTGAATTC
>fast #1 GCGAATAATC AAGACTCAGC ACCAATTTTT AGTTTATGGT CTAGTTCCTT ATAGGTTTTG TACTTCTTTT TTTTCGCTTG GCTATTTTGC GATTGAATTC
.....
Consensus #-3751 GCGAATAATC AAGACTCAGC ACCAATTTTT AGTTTATGGT CTAGTTCCTT ATAGGTTTTG TACYTCTTTT TTTYCGCTTG GCTATTTTGC GATTGAATTC

>slow #101 ATAAATATGG AATCAAATCT ATAGAGTGGA GAGTGGAAC T AACGAGGTGA GAGGTAACAA TATAGTTTTT GGGCAATCAG AAGCAACAAA CAAATATCTG
>fast #101 ATAAATATGG AATCAAATCT ATAGAGTGGA GAGTGGAAC T AACGAGGTGA GAGGTAACAA TATAGTTTTT GGGCAATCAG AAGCAACAAA CAAATATCTG
.....
Consensus #-3651 ATAAATATGG AATCAAATCT ATAGAGTGGA GAGTGGAAC T AACGAGGTGA GAGGTAACAA TATAGTTTTT GGGCAATCAG AAGCAACAAA CAAATATCTG

>slow #201 CAATAACTCG TTGAATTCGA AACAAAATTA ACTGCATTTA TACTAAATAT ATAATTGCTA TAGGATGAGT TAGCCGCTCT GCGGTTTCCC AAACCCCAAA
>fast #201 CAATAACTCG TTGAATTCGA AACAAAATTA ACTGCATTTA TACTAAATAT ATAATTGCTA TAGGATGAGT TAGCCGCTCT GCGGTTTCCC AAACCCCAAA
.....
Consensus #-3551 CAATAACTCG TTGAATTCGA AACAAAATTA ACTGCATTTA TACTAAATAT ATAATTGCTA TAGGATGAGT TAGCCGCTCT GCGGTTTCCC AAACCCCAAA

>slow #301 AGCAAAGTCA AGCGTGTAGG AAACCTGATC AGATCGCGGG AAAGATTCTC TGCACTCAAT TACGTCAAAC CAGGTTGATT TCCTCCTTTT CGCTGTGCAG
>fast #301 AGCAAAGTCA AGCGTGTAGG AAACCTGATC AGATCGCGGG AAAGATTCTC TGCACTCAAT TACGTCAAAC CAGGTTGATT TCCTCCTTTT CGCTGTGCAG
.....
Consensus #-3451 AGCAAAGTCA AGCGTGTAGG AAACCTGATC AGATCGCGGG AAAGATTCTC TGCACTCAAT TACGTCAAAC CAGGTTGATT TCCTCCTTTT CGCTGTGCAG

>slow #401 AGATTGGCAA ATGGGTCAA TGGGTGAGG AGTGAATAG TAAATTAGAT TATGTTTGA TCGAGATGCA ATGCAAGCCG CGCCCCAAAT AAATGGAACG
>fast #401 AGATTGGCAA ATGGGTCAA TGGGTGAGG AGTGAATAG TAAATTAGAT TATGTTTGA TCGAGATGCA ATGCAAGCCG CGCCCCAAAT AAATGGAACG
.....
Consensus #-3351 AGATTGGCAA ATGGGTCAA TGGGTGAGG AGTGAATAG TAAATTAGAT TATGTTTGA TCGAGATGCA ATGCAAGCCG CGCCCCAAAT AAATGGAACG

>slow #501 TGCCTAGTGA GGGTTCCCC TTGCCCTGG TAACCTTCG TTTACCACC CGTTTTCCG CTTTTCCGCT CCCAAACACT AGAGGTAAGC TGCTTAGACC
>fast #501 TGCCTAGTGA GGGTTCCCC TTGCCCTGG TAACCTTCG TTTACCACC CGTTTTCCG CTTTTCCGCT CCCAAACACT AGAGGTAAGC TGCTTAGACC
.....
Consensus #-3251 TGCCTAGTGA GGGTTCCCC TTGCCCTGG TAACCTTCG TTTACCACC CGTTTTCCG CTTTTCCGCT CCCAAACACT AGAGGTAAGC TGCTTAGACC

>slow #601 CCGGCGTTTA GAAGCCCCAG TTTCTGTTCA CTAGGCAGAC ACACFCGAG CCGGAAGACA ATGCCACCGC CACCGCCACC GACTTAATCA GCCCGGGAAA
>fast #601 CCGGCGTTTA GAAGCCCCAG TTTCTGTTCA CTAGGCAGAC ACACFCGAG CCGGAAGACA ATGCCACCGC CACCGCCACC GACTTAATCA GCCCGGGAAA
.....
Consensus #-3151 CCGGCGTTTA GAAGCCCCAG TTTCTGTTCA CTAGGCAGAC ACACFCGAG CCGGAAGACA ATGCCACCGC CACCGCCACC GACTTAATCA GCCCGGGAAA

>slow #701 CGCATCTCA ATGCTGGCGA GCGTGTACCT ACATATGGAC ATGGGCGTGC GTTGGTGCAG GAGCTGGTGT AAATCGGTTT TGGCAGGTAC GCCGTGGCG
>fast #701 CGCATCTCA ATGCTGGCGA GTGTGTACCT ACATATGGAC ATGGGCGTGC GTTGGTGCAG GAGCTGGTGT AAATCGGTTT TGGCAGGTAC GCCGTGGCG
.....
Consensus #-3051 CGCATCTCA ATGCTGGCGA GCGTGTACCT ACATATGGAC ATGGGCGTGC GTTGGTGCAG GAGCTGGTGT AAATCGGTTT TGGCAGGTAC GCCGTGGCG

>slow #801 TCATTA:CCC CCCAGAGGTT GAATGTCACC GCGGCATGA CTTGGGGGCC AAGCCGATAA GCGGCACACT GTCCACTGCA CGGTGTACAC TGATAAAAAAT
>fast #801 TCATTACCCC CCCAGAGGTT GAATGTCACC GCGGCATGA CTTGGGGGCC AAGCCGATAA GCGGCACACT GTCCACTGCA CGGTGTACAC TGATAAAAAAT
.....
Consensus #-2951 TCATTACCCC CCCAGAGGTT GAATGTCACC GCGGCATGA CTTGGGGGCC AAGCCGATAA GCGGCACACT GTCCACTGCA CGGTGTACAC TGATAAAAAAT

>slow #901 ATATATCAAG ACCAAATATT GTTAAAGATA ATTGATCGGT AAAGAAATA CACTTGCAAG TTTAAATGTT TTCACCTTAA TGTGTTTTTC TTTT:AAATAC
>fast #901 ATATATCAAG ACCAAATATT GTTAAAGATA ATTGATCGGT AAAGAAATA CACTTGCAAG TTTAAATGTT TTCACCTTAA TGTGTTTTTC TTTTAAATAC
.....
Consensus #-2851 ATATATCAAG ACCAAATATT GTTAAAGATA ATTGATGVTG AAAGAAATA CACTTGCAAG TTTAAATGTT TTCACCTTAA TGTGTTTTTC TTTTAAATAC

>slow #1001 TCTATTAECT AATATAAATT ATCACC AAAAACATTA ATTTGGGAAA TGTATACACC AAAAGCTTTT GCCACTATAG AAAATACAGA TAAATCTAAA
>fast #1001 TCTATTAECT AATATAAATT ATCACC AAAAACATTA ATTTGGGAAA TGTATACACC AAAAGCTTTT GCCACTATAG AAAATACAGA TAAATCTAAA
.....
Consensus #-2751 TCTATTAECT AATATAAATT ATCACC AAAAACATTA ATTTGGGAAA TGTATACACC AAAAGCTTTT GCCACTATAG AAAATACAGA TAAATCTAAA

>slow #1101 AATAAATTC TTTGACGCAT GCACGAAATA AGATAAACAA ATTTGATTTT ATTTCTTAT TTACACAATT CATTTTATTT GCATGCATTT CATTTTGTTC
>fast #1101 AATAAATTC TTTGACGCAT GCACGAAATA AGATAAACAA ATTTGATTTT ATTTCTTAT TTACACAATT CATTTTATTT GCATGCATTT CATTTTGTTC
.....
Consensus #-2651 AATAAATTC TTTGACGCAT GCACGAAATA AGATAAACAA ATTTGATTTT ATTTCTTAT TTACACAATT CATTTTATTT GCATGCATTT CATTTTGTTC

>slow #1201 AGTGTACCTA ATAAAAACGA TTTCTGTTGC CCCAAGCAGT AAGAAGATGT TAGGCACGTC TGCTGATAAG GAAAACGTGA GCCCCAGACT AGGCCAGACC
>fast #1201 AGTGTACCTA ATAAAAACGA TTTCTGTTGC CCCAAGCAGT AAGAAGATGT TAGGCACGTC TGCTGATAAG GAAAACGTGA GCCCCAGACT AGGCCAGACC
.....
Consensus #-2551 AGTGTACCTA ATAAAAACGA TTTCTGTTGC CCCAAGCAGT AAGAAGATGT TAGGCACGTC TGCTGATAAG GAAAACGTGA GCCCCAGACT AGGCCAGACC

>slow #1301 ATATTA AATT AACGTCTGGA GGCAGCAACA GTCATACGAT TTTTTTTTTT ATATTACTTC GCGGTCAGTT GCCAAGGCAG GAGAGCAACC CGTTTCGATTA
>fast #1301 ATATTA AATT AACGTCTGGA GGCAGCAACA GTCATACGAT TTTTTTTTTT ATATTACTTC GCGGTCAGTT GCCAAGGCAG GAGAGCAACC CGTTTCGATTA
.....
Consensus #-2451 ATATTA AATT AACGTCTGGA GGCAGCAACA GTCATACGAT TTTTTTTTTT ATATTACTTC GCGGTCAGTT GCCAAGGCAG GAGAGCAACC CGTTTCGATTA

>slow #1401 GTGGGTCAAT TTGAAAATG AGTTATTGAC TCTGGGAAAT TGTGAGCTG AAAATTTAAT CGGAGCCCGA AAATTTCCAA TCATGCATTC CCCAAGTAC
>fast #1401 GTGGGTCAAT TTGAAAATG AGTTATTGAC TCTGGGAAAT TGTGAGCTG AAAATTTAAT CGGAGCCCGA AAATTTCCAA TCATGCATTC CCCAAGTAC
.....
Consensus #-2351 GTGGGTCAAT TTGAAAATG AGTTATTGAC TCTGGGAAAT TGTGAGCTG AAAATTTAAT CGGAGCCCGA AAATTTCCAA TCATGCATTC CCCAAGTAC

>slow #1501 CATATATGGA TTAGTGATAA CGCTCGATGC GACCCCAAAA GATTATCAAA AATATTTAAT ATGAATATAT GAAAAAAGA TTTAACTTTT ATGAATCTT
>fast #1501 CATATATGGA TTAGTGATAA CGCTCGATGC GACCCCAAAA GATTATCAAA AATATTTAAT ATGAATATAT GAAAAAAGA TTTAACTTTT ATGAATCTT
.....
Consensus #-2251 CATATATGGA TTAGTGATAA CGCTCGATGC GACCCCAAAA GATTATCAAA AATATTTAAT ATGAATATAT GAAAAAAGA TTTAACTTTT ATGAATCTT

>slow #1601 AAGCGTCCC AAAGCTGCGG GAGAACTGGG CCATAT:::A CCCGAAATAC ATGTTTATAC TTTAGCAAT GTATTTTCCA ATTAGGTGAT AGAACTTGTG
>fast #1601 AAGCGTCCC AAAGCTGCGG GAGAACTGGG CCATATATGA CCCGAAATAC ATGTTTATAC TTTAGCAAT GTATTTTCCA ATTAGGTGAT AGAACTTGTG
.....
Consensus #-2151 AAGCGTCCC AAAGCTGCGG GAGAACTGGG CCATATATGA CCCGAAATAC ATGTTTATAC TTTAGCAAT GTATTTTCCA ATTAGGTGAT AGAACTTGTG

>slow #1701 TGCACACACA CATATAGTTC TATATCAACA AACAGGTTTA AGTTTATG CAAATGAAAG CTTATTTCTT CCGCATGCTT ATCTCTTTCC TTCTCATCAT
>fast #1701 TGCACACACA CATATAGTTC TATATCAACA AACAGGTTTA AGTTTATG CAAATGAAAG CTTATTTCTT CCGCATGCTT ATCTCTTTCC TTCTCATCAT
.....
Consensus #-2051 TGCACACACA CATATAGTTC TATATCAACA AACAGGTTTA AGTTTATG CAAATGAAAG CTTATTTCTT CCGCATGCTT ATCTCTTTCC TTCTCATCAT

```

```

>slow #1801 ATGTATG:: :CAAAAATA CATGTGAATT TGCAGTAGCC TCCTCCCACA TCATATTTAA CGCCCTATAT TCAAAATTG CTCAGAAAA TATTTGAAAG
>fast #1801 ATGTATGTAT GCAAAAAATA CATATGAATT TGCAGTAGCC TCCTCCCACA TCATATTTAA CGCCCTATAT TCACAATTG CTCAGAAAA TATTTGAAAC
Consensus #-1951 ATGTATGTAT GCAAAAAATA CATRTGAATT TGCAGTAGCC TCCTCCCACA TCATATTTAA CGCCCTATAT TCAMAATTG CTCAGAAAA TATTTGAAAS

>slow #1901 CAAATGATT TTTAGTCAAT TAGTTTTTAA GTAATTAAGT GAAGTAAACA TATACAATTT TATTCCTTACC AAACACATAT ACTCATATAT TTTAAATAAA
>fast #1901 CAAATGATT TTTAGTCAAT TAGTTTTTAA GTAATTAAGT GGAGTAAACA TATACAATTT TATTCCTTCC AAACACATAT ACTCATATAT TTTAAATTAA
Consensus #-1851 CAAATGATT TTTAGTCAAT TAGTTTTTAA GTAATTAAGT GRAGTAAACA TATACAATTT TATTCCTWCC AAACACATAT ACTCATATAT TTTAAATWAA

>slow #2001 TAAATAACA AATATATAAA ATCTACGAAA TTGGCAACCA AATTTTAAAG CATTATAGTA TTGCCGATT AATTAATATA ATTAATAAT ATGTACATGT
>fast #2001 TAAATAACA AATATATAAA ATCTACGAAA TTGGCAACCA AATTTTAAAG CATTATAGTA TTGCCGATT AATTAATATA ATTAATAAT ATGTACATGT
Consensus #-1751 TAAATAACA AATATATAAA ATCTACGAAA TTGGCAACCA AATTTTAAAG CATTATAGTA TTGCCGATT AATTAATATA ATTAATAAT ATGTACATGT

>slow #2101 ATTAATCTTG TGTGCGAGCA TGGGTTAAAT CTAGCTGCAT TCGAAACCGC TACTCTGGCT CGGCCACAAA GTGGGCTTGG TCGCTGTTCG GGACAAGTGA
>fast #2101 ATTAATCTTG TGTGCGAGCA TGGGTTAAAT CTAGCTGCAT TCGAAACCGC TACTCTGGCT CGGCCACAAA GTGGGCTTGG TCGCTGTTCG GGACAAGTGA
Consensus #-1651 ATTAATCTTG TGTGCGAGCA TGGGTTAAAT CTAGCTGCAT TCGAAACCGC TACTCTGGCT CGGCCACAAA GTGGGCTTGG TCGCTGTTCG GGACAAGTGA

>slow #2201 GATTGCTAAT GAGCTGCTTT TAGGGGGCGT GTTGTGCTTG CTTTCCAAC TTTCTAGATT GATTCTACGC TGCCTCCAGC AGCCACCCTC TCCATCCCCA
>fast #2201 GATTGCTAAT GAGCTGCTTT TAGGGGGCGT GTTGTGCTTG CTTTCCAAC TTTCTAGATT GATTCTACGC TGCCTCCAGT AGCCACCCTC TCCATCCCTCA
Consensus #-1551 GATTGCTAAT GAGCTGCTTT TAGGGGGCGT GTTGTGCTTG CTTTCCAAC TTTCTAGATT GATTCTACGC TGCCTCCAGY AGCCACCCTC TCCATCCYCA

>slow #2301 TCCCCATCCC CATCACCATC CAGTCCCCTT GGCTCCCAGT CACAGTATTA CACGTATGCA AATTAAGCCG AAGTTC AATT GCGACCCGAG CAACAACACG
>fast #2301 TCCCCATCCC CATCACCATC CAGTCCCCTT GGCTCCCAGT CACAGTATTA CACGTATGCA AATTAAGCCG AAGTTC AATT GCGACCCGAG CAACAACACG
Consensus #-1451 TCCCCATCCC CATCACCATC CAGTCCCCTT GGCTCCCAGT CACAGTATTA CACGTATGCA AATTAAGCCG AAGTTC AATT GCGACCCGAG CAACAACACG

>slow #2401 ATCTTTCTAC ACTTCTCCTT GCTATGCTTG ACATTCACAA GGTC AAGCT CTTAATATTC TGGCTCGTGG CCCTACACTG TAAGAAATTA CTATAGAAAT
>fast #2401 ATCTTTCTAC ACTTCTCCTT GCTATGCTTG ACATTCACAA GGTC AAGCT CTTAATATTC TGGCTCGTGG CCCTACACTG TAAGAAATTA CTATAGAAAT
Consensus #-1351 ATCTTTCTAC ACTTCTCCTT GCTATGCTTG ACATTCACAA GGTC AAGCT CTTAATATTC TGGCTCGTGG CCCTACACTG TAAGAAATTA CTATAGAAAT

>slow #2501 AACGGTACAC GGAATAAGAT ATTTTTTTTT AGTCCATATG CTTTTAACAA ATGTGTTTTA AGTTTATGTT ATATTATTGT TAGAAAACT GTGTTTTTTTT
>fast #2501 AACGGTACAC GGAATAAGAT A:TTTTTTTT AGTCCATATG CTTTTAACAA ATGTGTTTTG AGTTTATGTT ATATTATTGT TAGAAAACT GTGTTTTTTTT
Consensus #-1251 AACGGTACAC GGAATAAGAT ATTTTTTTTT AGTCCATATG CTTTTAACAA ATGTGTTTTA AGTTTATGTT ATATTATTGT TAGAAAACT GTGTTTTTTTT

>slow #2601 :AAAAATCGGT TAAAAAATTA CTACGAGAGA AAAATACAAA TTTTGTAAT AAGATTGACT CTTTTTCGAT TTTGGAATAG TTTTATTAT TATAAGTTTT
>fast #2601 TAAAAATCGGT TAAAAAATTA CTACGAGAGA AAAATACAAA TTTTGTAAT AAGATTGACT CTTTTTCGAT TTTGGAATAG TTTTATTAT TTTATGTTTT
Consensus #-1151 TAAAAATCGGT TAAAAAATTA CTACGAGAGA AAAATACAAA TTTTGTAAT AAGATTGACT CTTTTTCGAT TTTGGAATAK TTTTATTAT TWTAWGTTTT

>slow #2701 TACGTTTTCA CTTATTGTT TCTCAGTGCA CTTTCTGGTG TTCCATTTC TATTGGGCTC TTTACCCCGC ATTTGTTTGC AGATCACTTG CTGCGCATT
>fast #2701 TACGTTTTCA CTTATTGTT TCTCAGTGCA CTTTCTGGTG TTCCATTTC TATTGGGCTC TTTACCCCGC ATTTGTTTGC AGATCACTTG CTGCGCATT
Consensus #-1051 TACGTTTTCA CTTATTGTT TCTCAGTGCA CTTTCTGGTG TTCCATTTC TATTGGGCTC TTTACCCCGC ATTTGTTTGC AGATCACTTG CTGCGCATT

>slow #2801 TTTATTGCAT TTTACATATT ACACATTATT TGAACGCCGC TGCTGCTGCA TCCGTCGAGC TCGACTGCAC TCGCCCCCAG GAGAGAACAG TATTTAAGGA
>fast #2801 TTTATTGCAT TTTACATATT ACACATTATT TGAACGCCGC TGCTGCTGCA TCCGTCGAGC TCGACTGCAC TCGCCCCCAG GAGAGAACAG TATTTAAGGA
Consensus #-951 TTTATTGCAT TTTACATATT ACACATTATT TGAACGCCGC TGCTGCTGCA TCCGTCGAGC TCGACTGCAC TCGCCCCCAG GAGAGAACAG TATTTAAGGA

>slow #2901 GCTGCGAAGG TCCAAGTCA CGATTATTGT CTCAGTGAGC TTGTCAGTTG CAGTTCAGCA GACGGGCTAA CGAGTACTTG CATCTCTTCA AATTTACTTA
>fast #2901 GCTGCGAAGG TCCAAGTCA GCATTATTGT CTCAGTGAGC TTGTCAGTTG CAGTTCAGCA GACGGGCTAA CGAGTACTTG CATCTCTTCA AATTTACTTA
Consensus #-851 GCTGCGAAGG TCCAAGTCA X SSATTATTGT CTCAGTGAGC TTGTCAGTTG CAGTTCAGCA GACGGGCTAA CGAGTACTTG CATCTCTTCA AATTTACTTA
Y (rect)

>slow #3001 ATTGATCAAG TAAGTAGCAA AAGGCCACAC AATTGAAGGA AATTCCTGTT TAATTGAATT TATTGTGCAA GTGCGGAAAT AAAATGACAG GATTGAATAG
>fast #3001 ATTGATCAAG TAAGTAGCAA AAGGCCACAC AATTGAAGGA AATTCCTGTT TAATTGAATT TATTGTGCAA GTGCGGAAAT AAAATGACAG TATTAATAG
Consensus #-751 ATTGATCAAG TAAGTAGCAA AAGGCCACAC AATTGAAGGA AATTCCTGTT TAATTGAATT TATTRTGCAA GTGCGGAAAT AAAATGACAG KATTRAATAG

>slow #3101 TAAAAATAGTA AAATGAATT GTAAAATCAT ATATAATCAA ATTTATTCAA TCAGAACTAA TTCAAGCTGT CACAAGTAGT GCGAAGTCAA TTAATTGGCA
>fast #3101 T:AAAATATT: ::::TT GTAAAATCAT ATATAATCAA ATTTATTCAA TCAGAACTAA TTCAAGCTGT CACAAGTAGT GCGAAGTCAA TTAATTGGCA
Consensus #-651 TAAAAATAKTA AAATGAATT GTAAAATCAT ATATAATCAA ATTTATTCAA TCAGAACTAA TTCAAGCTGT CACAAGTAGT GCGAAGTCAA TTAATTGGCA

>slow #3201 TCGAATTAATA ATTTGGAGGC CTGTGCCGCA TATTCTCTTT GAAAATCAC CTGTTAGTTA ACTTCTAAAA ATAGGAATTT TAACATAACT CGTCCCTGTT
>fast #3201 TCGAATTAATA ATTTGGAGGC CTGTGCCGCA TATTCTCTTT GAAAATCAC CTGTTAGTTA ACTTCTAAAA ATAGGAATTT TAACATAACT CGTCCCTGTT
Consensus #-551 TCGAATTAATA ATTTGGAGGC CTGTGCCGCA TATTCTCTTT GAAAATCAC CTGTTAGTTA ACTTCTAAAA ATAGGAATTT TAACATAACT CGTCCCTGTT

>slow #3301 AATCGGCGCC GTGCCCTTCGT TAGCTATCTC AAAAGCGAGC GCGTGCAGAC GAGCAGTAAT TTTCCAAGCA TCAGGCATAG TTGGGCATAA ATTATAACA
>fast #3301 AATCGGCGCC GTGCCCTTCGT TAGCTATCTC AAAAGCGAGC GCGTGCAGAC GAGCAGTAAT TTTCCAAGCA TCAGGCATAG AATATACTAA TACTAATACT
Consensus #-451 AATCGGCGCC GTGCCCTTCGT TAGCTATCTC AAAAGCGAGC GCGTGCAGAC GAGCAGTAAT TTTCCAAGCA TCAGGCATAG WWWKMMTAA WWWWAWACW

>slow #3401 TACAAA::: :CCGAATACT AATATAGAAA AAGCTTTGCC GGTACAAAAT CCAAACAAA AACAAACCGT GTGTGCCGAA AAATAAAAAA AAACCATAAA
>fast #3401 AATACTAATA TAAGAATACT AATATAGAAA AAGCTTTGCC GGTACAAAAT CCAAACAAA AACAAACCGT GTGTGCCGAA AAATAAAAAA AAACCATAAA
Consensus #-351 WAYAMWAATA TMMGAATACT AATATAGAAA AAGCTTTGCC GGTACAAAAT CCAAACAAA AACAAACCGT GTGTGCCGAA AAATAAAAAA AAACCATAAA

>slow #3501 CTAGGCTGCT CAGCCGGCGA CGGCAATAAA CCATAAACTA GGCAGCGCTG CCGTCGCCGG CTGAGCAGCC TGCGTACATA GCCGAGATCG CGTAACGGTA
>fast #3501 CTAGGCTGCT CAGCCGGCGA CGGCAATAAA CCATAAACTA GGCAGCGCTG CCGTCGCCGG CTGAGCAGCC TGCGTACATA GCCGAGATCG CGTAACGGTA
Consensus #-251 CTAGGCTGCT CAGCCGGCGA CGGCAATAAA CCATAAACTA GGCAGCGCTG CCGTCGCCGG CTGAGCAGCC TGCGTACATA GCCGAGATCG CGTAACGGTA

```

```

>slow #3601 GATAATGAAA AGCTCTACGT AACCGAAGCT TCTGCTGTAC GGATCTTCTT ATAAATACGG GGCCGACACG AACTGGAAAC CAACAACATA CGGAGCCCTC
>fast #3601 GATAATGAAA AGCTCTACGT AACCGAAGCT TCTGCTGTAC GGATCTTCTT ATAAATACGG GGCCGACACG AACTGGAAAC CAACAACATA CGGAGCCCTC
Consensus #-151 GATAATGAAA AGCTCTACGT AACCGAAGCT TCTGCTGTAC GGATCTTCTT ATAAATACGG GGCCGACACG AACTGGAAAC CAACAACATA CGGAGCCCTC
Adh exon 2 Start
>slow #3701 TTCCAATTGA AACAGATCGA AAGAGCCTGC TAAAGCAAAA AAGAAGTCAC CATGTCGTTT ACTTTGACCA ACAAGAACGT GATTTTCGTT GCCGGTCTGG
>fast #3701 TTCCAATTGA AACAGATCGA AAGAGCCTGC TAAAGCAAAA AAGAAGTCAC CATGTCGTTT ACTTTGACCA ACAAGAACGT GATTTTCGTT GCCGGTCTGG
Consensus #-51 TTCCAATTGA AACAGATCGA AAGAGCCTGC TAAAGCAAAA AAGAAGTCAC CATGTCGTTT ACTTTGACCA ACAAGAACGT GATTTTCGTT GCCGGTCTGG
S (rec2)
>slow #3801 GAGGCATTGG TCTGGACACC AGCAAGGAGC TGCTCAAGCG CGATCTGAAG GTAACATATG GATGCCACA GGCTCCATGC AGCGATGGAG GTTAATCTTG
>fast #3801 GAGGCATTGG TCTGGACACC AGCAAGGAGC TGCTCAAGCG CGATCTGAAG GTAACATATG GATGCCACA GGCTCCATGC AGCGATGGAG GTTAATCTTG
Consensus #50 GAGGCATTGG TCTGGACACC AGCAAGGAGC TGCTCAAGCG CGATCTGAAG GTAACATATG GATGCCACA GGCTCCATGC AGCGATGGAG GTTAATCTTG
Adh exon 3
>slow #3901 TGTATTCAAT CCTAGAACCT GGTGATCCTC GACCGCATGG AGAACCCGGC TGCCATTGCC GAGCTGAAG CAATCAATCC AAAGGTGACC GTCACCTTCT
>fast #3901 TGTATTCAAT CCTAGAACCT GGTGATCCTC GACCGCATGG AGAACCCGGC TGCCATTGCC GAGCTGAAG CAATCAATCC AAAGGTGACC GTCACCTTCT
Consensus #150 TGTATTCAAT CCTAGAACCT GGTGATCCTC GACCGCATGG AGAACCCGGC TGCCATTGCC GAGCTGAAG CAATCAATCC AAAGGTGACC GTCACCTTCT
>slow #4001 ACCCCTATGA TGTGACCGTG CCCATTGCCG AGACCACCAA GCTGCTGAAG ACCATCTTCG CCCAGCTGAA GACCGTCGAT GTCCCTGATCA ACGGAGCTGG
>fast #4001 ACCCCTATGA TGTGACCGTG CCCATTGCCG AGACCACCAA GCTGCTGAAG ACCATCTTCG CCCAGCTGAA GACCGTCGAT GTCCCTGATCA ACGGAGCTGG
Consensus #250 ACCCCTATGA TGTGACCGTG CCCATTGCCG AGACCACCAA GCTGCTGAAG ACCATCTTCG CCCAGCTGAA GACCGTCGAT GTCCCTGATCA ACGGAGCTGG
>slow #4101 TATCCTGGAC GATCACCAGA TCGAGCGCAC CATTGCCGTC AACTACACTG GCCTGGTCAA CACCACGACG GCCATTCTGG ACTTCTGGGA CAAGCGCAAG
>fast #4101 TATCCTGGAC GATCACCAGA TCGAGCGCAC CATTGCCGTC AACTACACTG GCCTGGTCAA CACCACGACG GCCATTCTGG ACTTCTGGGA CAAGCGCAAG
Consensus #350 TATCCTGGAC GATCACCAGA TCGAGCGCAC CATTGCCGTC AACTACACTG GCCTGGTCAA CACCACGACG GCCATTCTGG ACTTCTGGGA CAAGCGCAAG
>slow #4201 GCGGTTCCCG GTGGTATCAT CTGCAACATT GGATCCGTC A CTGGATTCAA TGCCATCTAC CAGGTGCCG TCTACTCCG CACCAAGGCC GCCGTGGTCA
>fast #4201 GCGGTTCCCG GTGGTATCAT CTGCAACATT GGATCCGTC A CTGGATTCAA TGCCATCTAC CAGGTGCCG TCTACTCCG CACCAAGGCC GCCGTGGTCA
Consensus #450 GCGGTTCCCG GTGGTATCAT CTGCAACATT GGATCCGTC A CTGGATTCAA TGCCATCTAC CAGGTGCCG TCTACTCCG CACCAAGGCC GCCGTGGTCA
Adh exon 4
>slow #4301 ACTTCACCAG CTCCTGGCG GTAAGTTGAT CAAAGGAAAC GCAAAGTTT CAAGAAAAA CAAAATAAT TTGATTTATA ACACCTTATG AAACCTGGCC
>fast #4301 ACTTCACCAG CTCCTGGCG GTAAGTTGAT CAAAGGAAAC GCAAAGTTT CAAGAAAAA CAAAATAAT TTGATTTATA ACACCTTATG AAACCTGGCC
Consensus #550 ACTTCACCAG CTCCTGGCG GTAAGTTGAT CAAAGGAAAC GCAAAGTTT CAAGAAAAA CAAAATAAT TTGATTTATA ACACCTTATG AAACCTGGCC
>slow #4401 CCATTACCGG CGTGACCGCT TACTACTGTA ACCCGGCAT CACCCGCACC ACCCTGGTGC ACAAGTTCAA CTCCTGGTTG GATGTTGAGC CTCAGGTTGC
>fast #4401 CCATTACCGG CGTGACCGCT TACTACTGTA ACCCGGCAT CACCCGCACC ACCCTGGTGC ACAAGTTCAA CTCCTGGTTG GATGTTGAGC CTCAGGTTGC
Consensus #650 CCATTACCGG CGTGACCGCT TACTACTGTA ACCCGGCAT CACCCGCACC ACCCTGGTGC ACAAGTTCAA CTCCTGGTTG GATGTTGAGC CTCAGGTTGC
E K192T
>slow #4501 CGAGAAGCTC CTGGCTCATC CCACCCAGCC CTCGTTGGCC TGCGCCGAGA ACTTCGTCAA GGCTATCGAG CTGAACCAGA ACGGAGCCAT CTGGAACATG
>fast #4501 CGAGAAGCTC CTGGCTCATC CCACCCAGCC CTCGTTGGCC TGCGCCGAGA ACTTCGTCAA GGCTATCGAG CTGAACCAGA ACGGAGCCAT CTGGAACATG
Consensus #750 CGAGAAGCTC CTGGCTCATC CCACCCAGCC CTCGTTGGCC TGCGCCGAGA ACTTCGTCAA GGCTATCGAG CTGAACCAGA ACGGAGCCAT CTGGAACATG
Stop
>slow #4601 GACTTGGGCA CCCTGGAGGC CATCCAGTGG ACCAAGCACT GGGACTCCGG CATCTAAGAA GTGATACTCC CAAAAAATAA AAAAAATA ACATTAGTTC
>fast #4601 GACTTGGGCA CCCTGGAGGC CATCCAGTGG ACCAAGCACT GGGACTCCGG CATCTAAGAA GTGATACTCC CAAAAAATAA AAAAAATA ACATTAGTTC
Consensus #850 GACTTGGGCA CCCTGGAGGC CATCCAGTGG ACCAAGCACT GGGACTCCGG CATCTAAGAA GTGATACTCC CAAAAAATAA AAAAAATA ACATTAGTTC
G (rec3)
>slow #4701 ATAGGGTTCT GCGAACCACA AAGATATTCA CGCAAGGCAA TAAGGCTGAT TCGATGCACA CTCACATTCT TCTCCTAATA CGATAATAAA ACTTTCCATG
>fast #4701 ATAGGGTTCT GCGAACCAG: AAGATATTCA CGCAAGGCAA TAAGGCTGAT TCGATGCACA CTCACATTCT TCTCCTAATA CGATAATAAA ACTTTCCATG
Consensus #950 ATAGGGTTCT GCGAACCASA AAGATATTCA CGCAAGGCAA TAAGGCTGAT TCGATGCACA CTCACATTCT TCTCCTAATA CGATAATAAA ACTTTCCATG
>slow #4801 AAAAAATATGG AAAAAATATAT GAAAATTGAG AAATCCAAAA AACTGATAAA CGCTCTACTT AATTAATAA GATAAATGGG AGCGGCAGGA ATGGCGGAGC
>fast #4801 AAAAAATATGG AAAAAATATAT GAAAATTGAG AAATCCAAAA AACTGATAAA CGCTCTACTT AATTAATAA GATAAATGGG AGCGGCAGGA ATGGCGGAGC
Consensus #1050 AAAAAATATGG AAAAAATATAT GAAAATTGAG AAATCCAAAA AACTGATAAA CGCTCTACTT AATTAATAA GATAAATGGG AGCGGCAGGA ATGGCGGAGC
>slow #4901 ATGGCCAAAT TCCTCCGCCA ATCAGTCGTA AAACAGAAGT CGTGAAAGC GGATAGAAAG AATGTTTCAT TTGACGGGCA AGCATGTCTG CTATGTGGCG
>fast #4901 ATGGCCAAAT TCCTCCGCCA ATCAGTCGTA AAACAGAAGT CGTGAAAGC GGATAGAAAG AATGTTTCAT TTGACGGGCA AGCATGTCTG CTATGTGGCG
Consensus #1150 ATGGCCAAAT TCCTCCGCCA ATCAGTCGTA AAACAGAAGT CGTGAAAGC GGATAGAAAG AATGTTTCAT TTGACGGGCA AGCATGTCTG CTATGTGGCG
>slow #5001 GATTGCGGAG GAATTGCACT GGAGACCAGC AAGGTTCTCA TGACCAAGAA TATAGCGGTG AGTGAGCGGG AAGCTCGGTT TCTGTCCAGA TCGAACTCAA
>fast #5001 GATTGCGGAG GAATTGCACT GGAGACCAGC AAGGTTCTCA TGACCAAGAA TATAGCGGTG AGTGAGCGGG AAGCTCGGTT TCTGTCCAGA TCGAACTCAA
Consensus #1250 GATTGCGGAG GAATTGCACT GGAGACCAGC AAGGTTCTCA TGACCAAGAA TATAGCGGTG AGTGAGCGGG AAGCTCGGTT TCTGTCCAGA TCGAACTCAA
>slow #5101 AACTAGTCCA GCCAGTCGCT GTCGAAACTA ATTAAGTTAA TGAGTTTTTC ATGTTAGTTT CGCGCTGAGC AACAAATTAAG TTTATGTTTC AGTTCGGCTT
>fast #5101 AACTAGTCCA GCCAGTCGCT GTCGAAACTA ATTAAGTTAA TGAGTTTTTC ATGTTAGTTT CGCGCTGAGC AACAAATTAAG TTTATGTTTC AGTTCGGCTT
Consensus #1350 AACTAGTCCA GCCAGTCGCT GTCGAAACTA ATTAAGTTAA TGAGTTTTTC ATGTTAGTTT CGCGCTGAGC AACAAATTAAG TTTATGTTTC AGTTCGGCTT
>slow #5201 AGATTTTCGCT GAAGGACTTG CCACCTTCAA TCAATACTTT AGAACAAAAT CAAAACATCA TCTAATAGCT TGGTGTTCAT CTTTTTTTTT AATGATAAGC
>fast #5201 AGATTTTCGCT GAAGGACTTG CCACCTTCAA TCAATACTTT AGAACAAAAT CAAAACATCA TCTAATAGCT TGGTGTTCAT CTTTTTTTTT AATGATAAGC
Consensus #1450 AGATTTTCGCT GAAGGACTTG CCACCTTCAA TCAATACTTT AGAACAAAAT CAAAACATCA TCTAATAGCT TGGTGTTCAT CTTTTTTTTT AATGATAAGC

```



```

>slow      #7001      ATCTCAGCTA TATGGTGGGG TGAGTTGTGG GCACGCCGCC TTGGCATACT TCCAATTCGA GTGCGTTGTC TTCCCTCTAG TCGGGGGCCA CTCGGTTCGT
>fast      #7001      ATCTCAGCTA TATGGTGGGG TGAGTTGTGG GCACGCCGCC TTGGCATACT TCCAATTCGA GTGCGTTGTC TTCCCTCTAG TCGGGGGCCA CTCGGTTCGT
.....
Consensus  #3250      ATCTCAGCTA TATGGTGGGG TGAGTTGTGG GCACGCCGCC TTGGCATACT TCCAATTCGA GTGCGTTGTC TTCCCTCTAG TCGGGGGCCA CTCGGTTCGT

>slow      #7101      AAAAAATCAA TAGCCAGCAG ACCAAAAAGA GCCACAATAC CATCGGACAT TGAGGACCCA ACGCAACGGA ATGGAACCAA CGGAATCGCA TGGAGTGGAA
>fast      #7101      AAAAAATCAA TAGCCAGCAG ACCAAAAAGA GCCACAATAT CATCGGACAT TGAGGACCCA ACGCAACGGA ATGGAACCAA CGGAATCGCA TGGAGTGGAA
.....
Consensus  #3350      AAAAAATCAA TAGCCAGCAG ACCAAAAAGA GCCACAATAY CATCGGACAT TGAGGACCCA ACGCAACGGA ATGGAACCAA CGGAATCGCA TGGAGTGGAA

>slow      #7201      TCTGCCAGG  CCATATCAAA GCATTTTTCC AGAGTTCCCA CTCCCTGCCG TCCGCCGGCG TTGCAAGTTT GCTTTCTTTT CGATGGCGCA ACTTAATTC
>fast      #7201      TCTGCCAGG  CCATATCAAA GCATTTTTCC AGAGTTCCCA CTCCCTGCCG TCCGCCGGCG TTGCAAGTTT GCTTTCTTTT CGATGGCGCA ACTTAATTC
.....
Consensus  #3450      TCTGCCAGG  CCATATCAAA GCATTTTTCC AGAGTTCCCA CTCCCTGCCG TCCGCCGGCG TTGCAAGTTT GCTTTCTTTT CGATGGCGCA ACTTAATTC

>slow      #7301      AAAAAATCGAT TAGTCACTGT AAGCGAACCA TGCAATTGTC CAGCATTTTT CATTATAAC TCCTTTTTTT CGTTTAAATTT TTGCTGGTTT CCTCCCTTTT
>fast      #7301      AAAAAATCGAT TAGTCACTGT AAGCGAACCA TGCAATTGTC CAGCATTTTT CATTATAAC TCCTTTTTTT CGTTTAAATTT TTGCTGGTTT CCTCCCTTTT
.....
Consensus  #3550      AAAAAATCGAT TAGTCACTGT AAGCGAACCA TGCAATTGTC CAGCATTTTT CATTATAAC TCCTTTTTTT CGTTTAAATTT TTGCTGGTTT CCTCCCTTTT

>slow      #7401      TCCACTTTTT TTTTTGGCA CACGCTTGAT TAATTTGGTC AGCTGCCGGT TGGCAAGGAG GTGGGGGGGA GGACATTTAA AAATGCAGGA AGTAATCGAT
>fast      #7401      TCCACTTTTT TTTTTGGCA CACGCTTGAT TAATTTGGTC AGCTGCCGGT TGGCAAGGAG GTGGGGGGGA GGACATTTAA AAATGCAGGA AGTAATCGAT
.....
Consensus  #3650      TCCACTTTTT TTTTTGGCA CACGCTTGAT TAATTTGGTC AGCTGCCGGT TGGCAAGGAG GTGGGGGGGA GGACATTTAA AAATGCAGGA AGTAATCGAT

>slow      #7501      TGGCTAGGGC ACAATAGCCA AAATGGGAGA GGCAGTGCAA TCGCAAAAAA TATTGGGGTA TGTTCGCCTG AAGGAAATGC CGGAAAATAT TGAAAATTAC
>fast      #7501      TGGCTAGGGC ACAATAGCCA AAATGGGAGA GGCAGTGCAA TCGCAAAAAA TATTGGGGTA TGTTCGCCTG AAGGAAATGC CGGAAAATAT TGAAAATTAC
.....
Consensus  #3750      TGGCTAGGGC ACAATAGCCA AAATGGGAGA GGCAGTGCAA TCGCAAAAAA TATTGGGGTA TGTTCGCCTG AAGGAAATGC CGGAAAATAT TGAAAATTAC

>slow      #7601      GATACCAAGA TACATTGCAC GAAATAATAA ATATTCTGGG CCGGTAATTG ACCAATTTTG TTTGTCCATT TGATTGTAGG TGTACTCGTA AATGGTAGGT
>fast      #7601      GATACCAAGA TACATTGCAC GAAATAATAA ATATTCTGGG CCGGTAATTG ACCAATTTTG TTTGTCCATT TGATTGTAGG TGTACTCGTA AATGGTAGGT
.....
Consensus  #3850      GATACCAAGA TACATTGCAC GAAATAATAA ATATTCTGGG CCGGTAATTG ACCAATTTTG TTTGTCCATT TGATTGTAGG TGTACTCGTA AATGGTAGGT

>slow      #7701      TATATTAAT GACTAATAAT TATATTGAAT GCAACTATTC ATACTAAGAG TATCTAGGCT TCGACTAGTT CTAGTATTTT CCCCAACACT GTAGATCGAA
>fast      #7701      TATATTAAT GACTAATAAT TATATTGAAT GCAACTATTC ATACTAAGAG TATCTAGGCT TCGACTAGTT CTAGTATTTT CCCCAACACT GTAGATCGAA
.....
Consensus  #3950      TATATTAAT GACTAATAAT TATATTGAAT GCAACTATTC ATACTAAGAG TATCTAGGCT TCGACTAGTT CTAGTATTTT CCCCAACACT GTAGATCGAA

>slow      #7801      CAAAAACATG CGACCGACCG GTTGCCGGCA GTAGGTGGAG ATTAATCAAC AAAAAAAAAT TTGCGGAAAA ATGGAGGAAA AAATTACTGA TGCTTTTAA
>fast      #7801      CAAAAACATG CGACCGACCA GTTGCCGGCA GTAGGTGGAG ATTAATCAAC AAAAAAAAAT TTGCGGAAAA ATGGAGGAAA AAATTACTGA TGCTTTTAA
.....
Consensus  #4050      CAAAAACATG CGACCGACCR GTTGCCGGCA GTAGGTGGAG ATTAATCAAC AAAAAAAAAT TTGCGGAAAA ATGGAGGAAA AAATTACTGA TGCTTTTAA

>slow      #7901      ATGGCAATAC GTGCCTGGTC ACCA
>fast      #7901      ATGGCAATAC GTGCCTGGTC ACCA
.....
Consensus  #4150      ATGGCAATAC GTGCCTGGTC ACCA

```

**Figure S5.** Pairwise sequence alignment of *D. melanogaster* *slow* and *fast* alleles, showing recombinant mapping positions. This is an alternate view of Figure S4A. Cyan lines mark the right-most boundary of recombination breakpoints. Capital letters denote the recombinant strain name. *Adh* adult transcript structure is outlined in magenta. The “fast/slow” K192T amino acid change is marked in green. Yellow highlights causative substitutions; light yellow highlights substitutions in the 3’-UTR where the specific causative substitution was not resolved (Figure S4 and SI text).



A

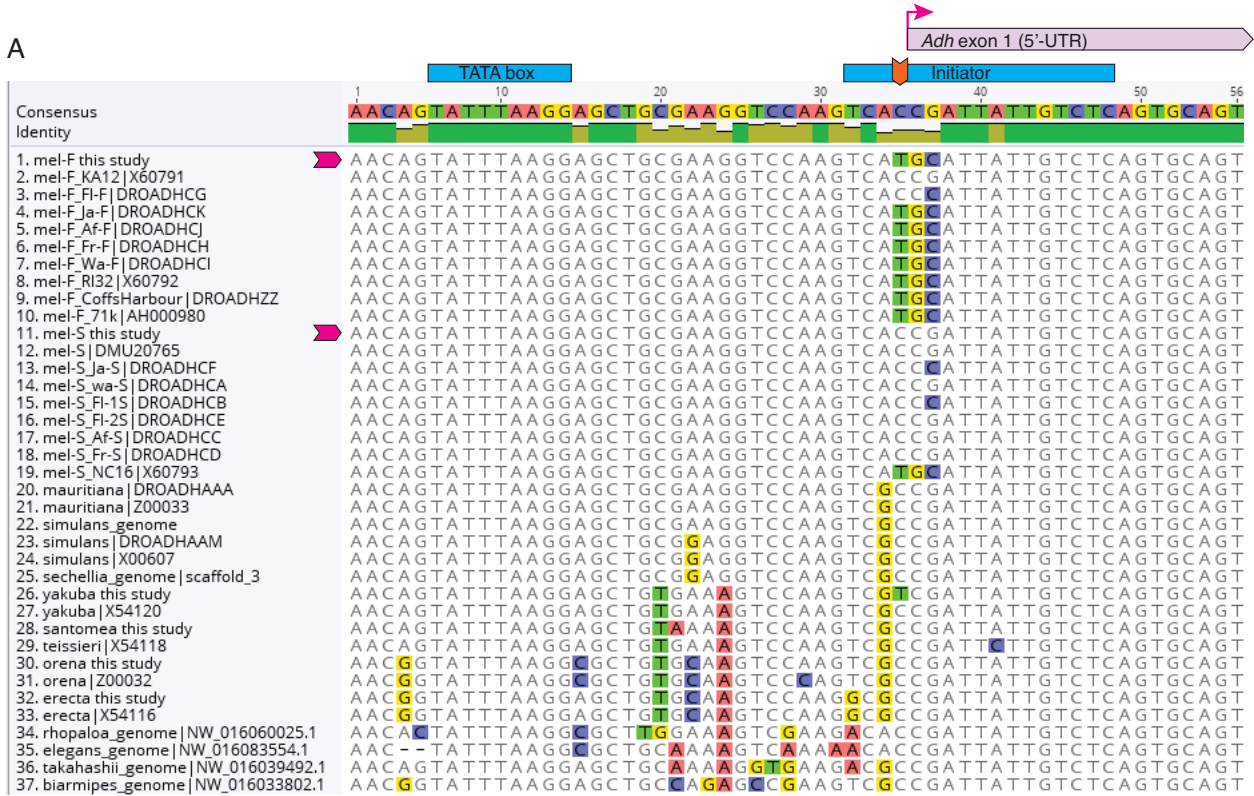

B

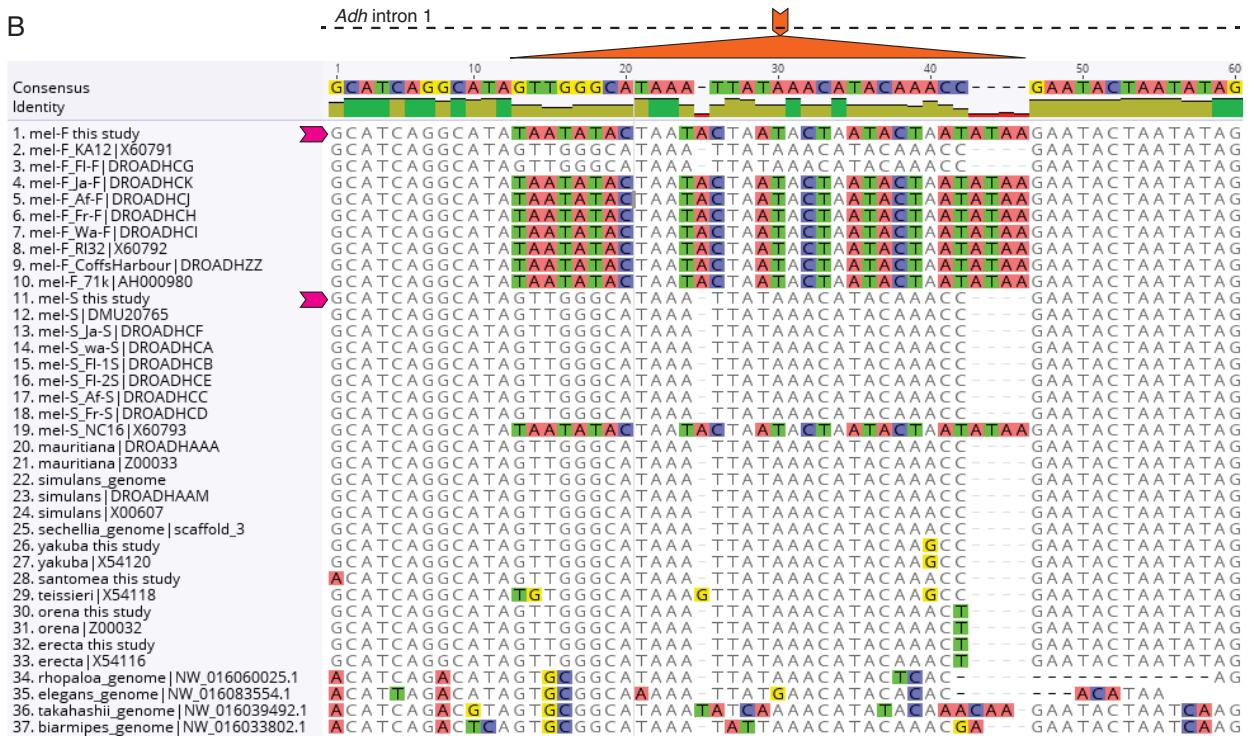

C

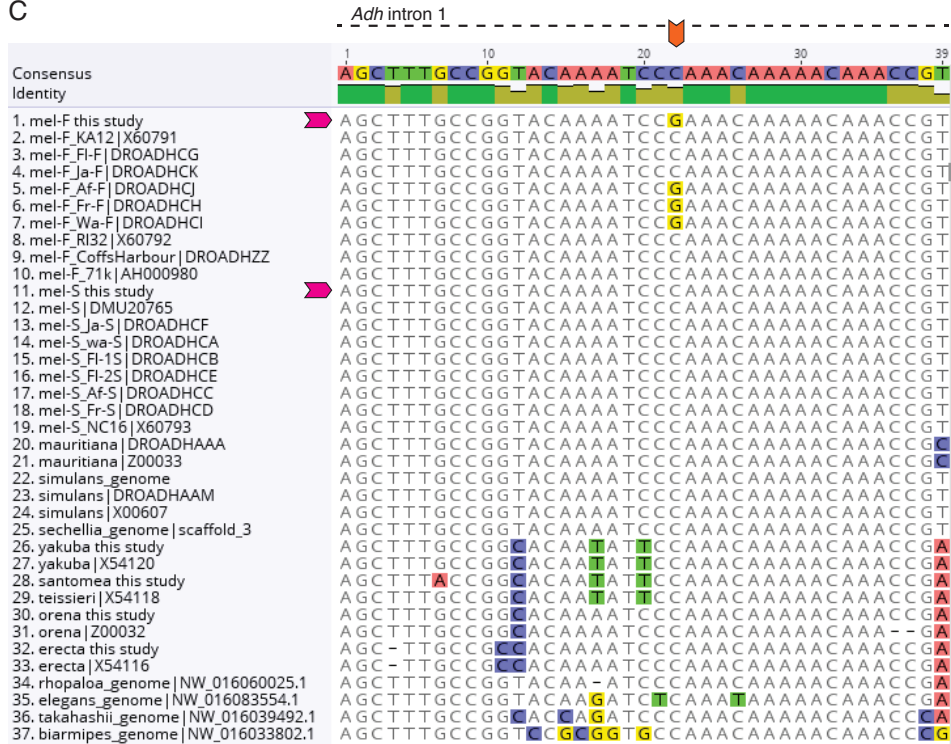

D

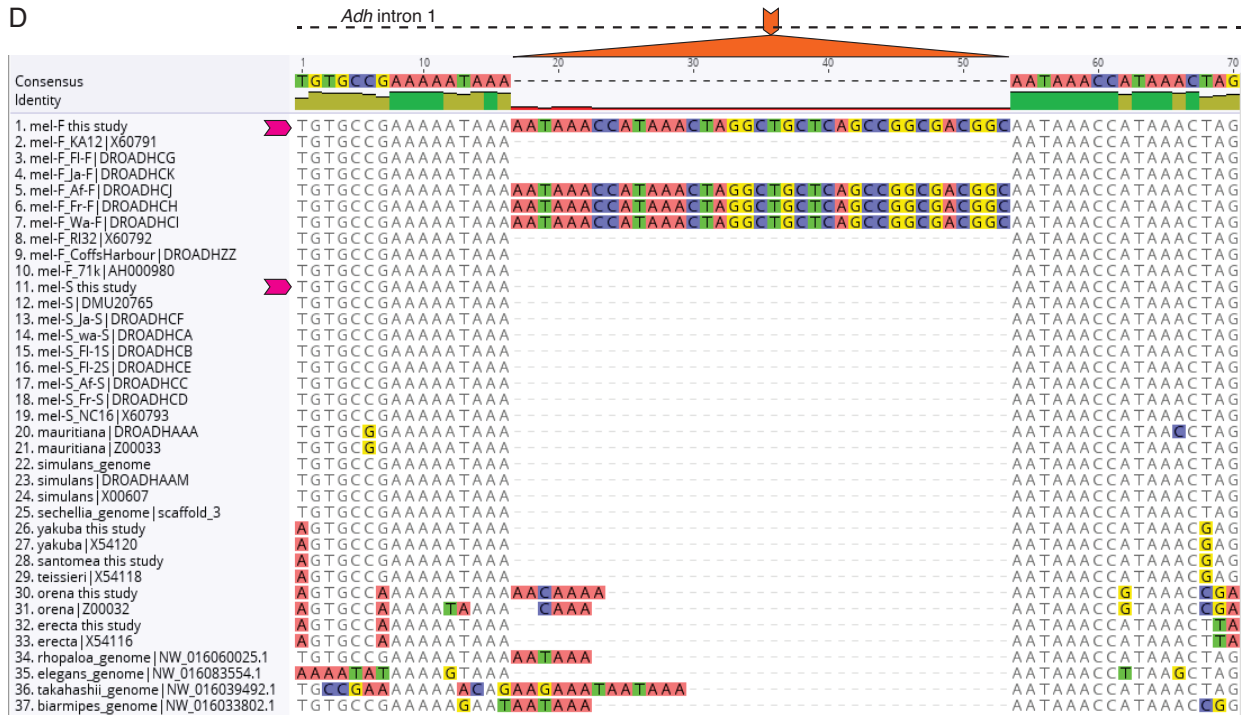

E

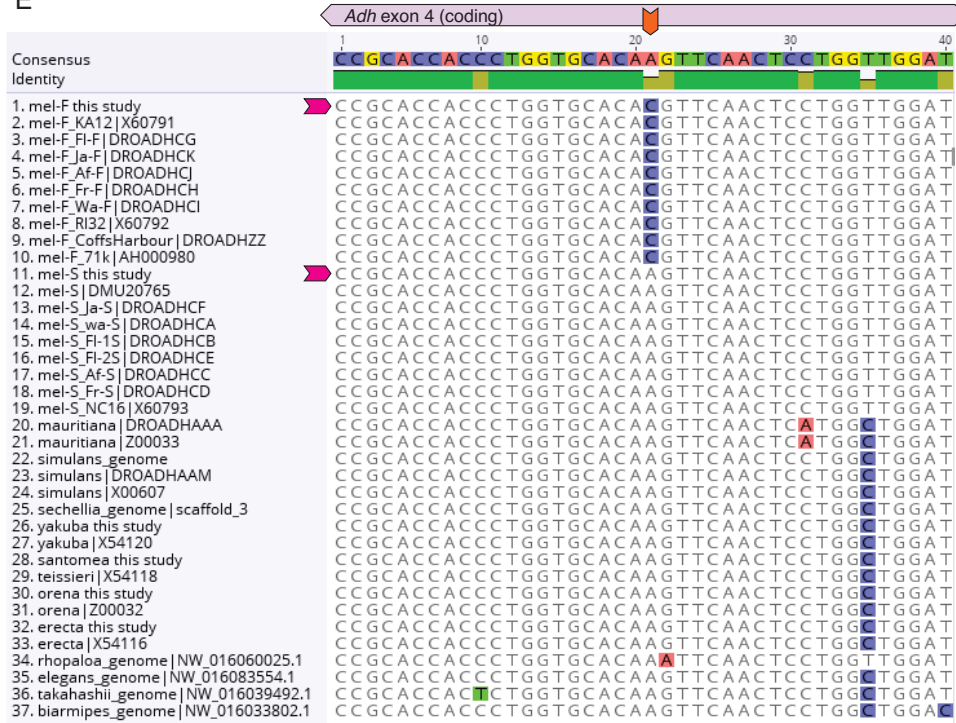

F

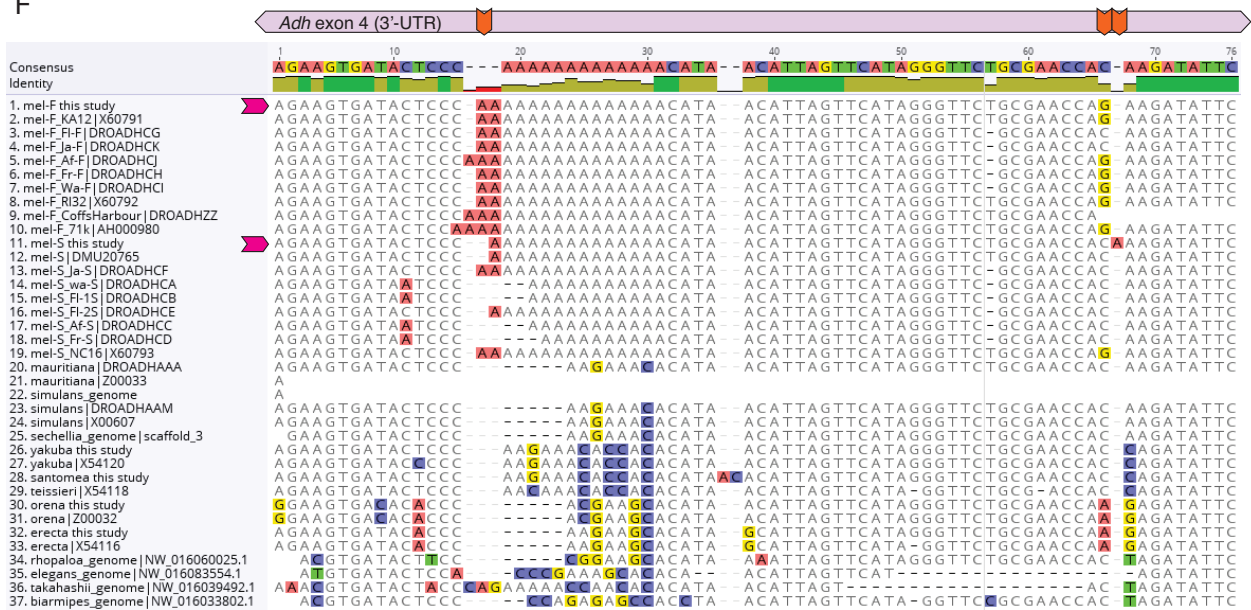

**Figure S6.** Evolution of causative sites between *D. melanogaster* alleles. For each site, the higher-activity allele (determined in Figure 5 and Figure S4) appears to be derived. The *melanogaster* haplotypes are named “F” or “S” based on amino acid 192 (panel E). Note that linkage disequilibrium among causative sites is partial, such that some *melanogaster* “F” haplotypes have low-activity alleles at other sites and vice versa. Orange arrowheads mark the causative site(s). Magenta arrowheads mark the two *melanogaster* alleles from this study where causative sites were mapped. Initiator and TATA box positions (panel A) were empirically

determined in reference (18). *Adh* sequences were retrieved from Genbank (accessions given after l) or Flybase (species labeled “genome”) and aligned using Geneious Prime.

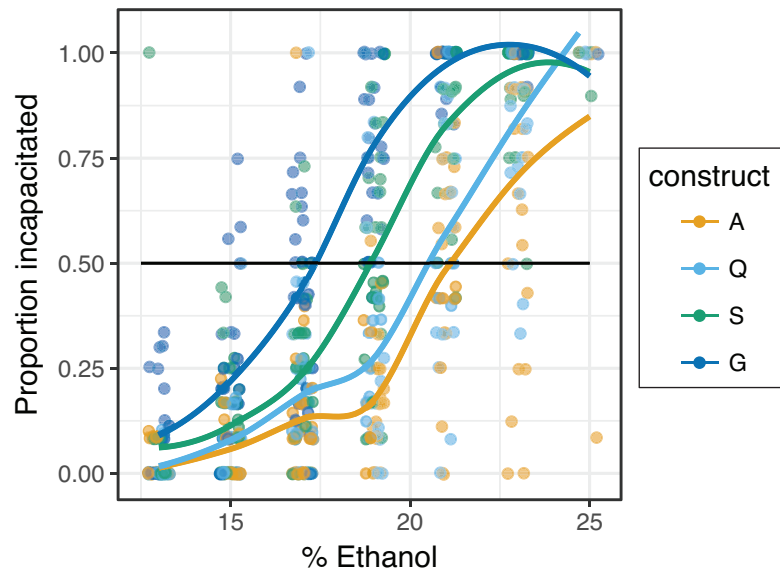

**Figure S7.** Flies show a positive dose-response relationship to ethanol toxicity, and this is affected by *Adh* genotype. Flies with recombinant *D. melanogaster Adh* alleles were exposed to sucrose solutions containing a series of ethanol concentrations. The proportion of flies in each vial that were incapacitated after 24h of ethanol exposure is shown by points (with x-axis jitter) and summarized by a LOESS curve. These data are presented as 50% incapacitating concentration ( $IC_{50}$ ) in Figure 6.



**Table S1.** Oligonucleotide primers.

| primer name       | species                   | purpose       | sequence                                                |
|-------------------|---------------------------|---------------|---------------------------------------------------------|
| >Adh_ame_lhsR2    | ame                       | amplify locus | TGAAACTTATCTCACACATTTTCGC                               |
| >Adh_ame_rhsF2    | ame                       | amplify locus | GAGGAATAAGACCAAGGGAAACA                                 |
| >Adh_CDS_F1       | mel                       | sequencing    | ATGTCGTTTACTTTGACCAACAAGA                               |
| >Adh_CDS_F2       | mel                       | sequencing    | AAGCAAAAAAGAAGTCACCATGTC                                |
| >Adh_clone_S3aAF1 | mel                       | amplify locus | GGGCGAATTCGCCggcgcgccGCGAATAATCA<br>AGACTCAGCACCA       |
| >Adh_clone_S3aAF2 | yak san<br>ere ore        | amplify locus | GGGCGAATTCGCCggcgcgcCTCGCACGCGAA<br>TAATCAAG            |
| >Adh_clone_S3aNR1 | mel yak<br>san ere<br>ore | amplify locus | TATGATCTAGAGTCgcgccgcTGGTGACCAG<br>GCACGTATTG           |
| >Adh_exon2_R1     | mel                       | sequencing    | TTCTCAATGCGGTCGAGGAT                                    |
| >Adh_exon2_R2     | mel                       | sequencing    | CAGGTTCTAGGATTGAATACACGA                                |
| >Adh_exon3_R3     | mel                       | sequencing    | GAGCGTTTATCAGTTTTTTGGATTT                               |
| >Adh_exon3_R4     | mel                       | sequencing    | GGAAAGTTTTATTATCGTATTAGGAGAAG                           |
| >Adh_vir_AF1      | vir ame                   | amplify locus | TTggcgcgcCTTATCAGTAAATTTACGAGTGG<br>TTTGT               |
| >Adh_vir_il1F     | vir                       | amplify locus | GAAATTCCTTTTTTGTGGTC                                    |
| >Adh_vir_il1R     | vir                       | amplify locus | GACCAGCAAAAAGGGAATTC                                    |
| >Adh_vir_il2F     | vir                       | amplify locus | TTTGCTTAAAATAAGAGGCGAGG                                 |
| >Adh_vir_il2R     | vir                       | amplify locus | CGCCTCTTATTTAAGCAAATCTC                                 |
| >Adh_vir_il3F     | vir                       | amplify locus | GCAAACCGTAAGTCCATTGTCTAC                                |
| >Adh_vir_il3R     | vir                       | amplify locus | GTAGACAATGGACTTACGGTTTGC                                |
| >Adh_vir_ir1F     | vir                       | amplify locus | TAGCCGAGACATTGCTGTTGAG                                  |
| >Adh_vir_ir1R     | vir                       | amplify locus | CTCAACAGCAATGTCTCGGCTA                                  |
| >Adh_vir_ir2F     | vir                       | amplify locus | TACATCACCCACGCTTGAATG                                   |
| >Adh_vir_ir2R     | vir                       | amplify locus | CATTTCAAGCGTGGGTGATGTA                                  |
| >Adh_vir_NR1      | vir ame                   | amplify locus | ATGTTAgcgccgcCTGTTTTGCTGTCTGAATTT<br>TGTG               |
| >Adh_vir_s3aAF1   | vir ame                   | amplify locus | CCCGGGCGAATTCGCCggcgcgccTTATCAGT<br>AAATTTACGAGTGGTTTGT |
| >Adh_vir_s3aNR1   | vir ame                   | amplify locus | CTGATTATGATCTAGAGTCgcgccgcTGTTTT<br>GCTGTCTGAATTTTGTG   |
| >Adhseq_-0278F    | mel                       | sequencing    | TGCCGGTACAAAATCCCAA                                     |
| >Adhseq_-0408R    | mel                       | sequencing    | GCCGATTAACAGGGACGAGT                                    |
| >Adhseq_-0429F    | mel                       | sequencing    | TACTCGTCCCTGTTAATCGGC                                   |
| >Adhseq_-0773F    | mel yak<br>san            | sequencing    | TCAGTGCAGTTGTCAGTTGC                                    |
| >Adhseq_-0909R    | mel                       | sequencing    | CGCAAGCAAGTGATCTGCAA                                    |
| >Adhseq_-1294F    | mel yak<br>san            | sequencing    | ACACTTCTCCTTGCTATGCTTG                                  |
| >Adhseq_-1419R    | mel yak<br>san            | sequencing    | TGGAGGCAGCGTAGAATCAA                                    |
| >Adhseq_-1857F    | mel yak<br>san            | sequencing    | TCCTCCACATCATATTTAACGC                                  |
| >Adhseq_-1915R    | mel yak                   | sequencing    | AGCATGCGGAAGAAATAAGCT                                   |

|                |                |               |                                      |
|----------------|----------------|---------------|--------------------------------------|
|                | san            |               |                                      |
| >Adhseq_-2309F | mel yak<br>san | sequencing    | GCAACCCGTTTCGATTAGTGG                |
| >Adhseq_-2391R | mel            | sequencing    | GGTCTGGCCTAGTCTGGG                   |
| >Adhseq_-2834F | mel            | sequencing    | ATAAGGCGCACACTGTCCACT                |
| >Adhseq_-2900R | mel yak<br>san | sequencing    | CGTACCTGCCAAAACCGATT                 |
| >Adhseq_-3285F | mel            | sequencing    | GGCAAATGGGTCAAATGGGT                 |
| >Adhseq_-3409R | mel            | sequencing    | GCAAGACGGCTAACTCATCC                 |
| >Adhseq_+0105R | mel            | sequencing    | AGTTACCTTCAGATCGCGCT                 |
| >Adhseq_+0224F | mel yak<br>san | sequencing    | CAATCCAAAGGTGACCGTCA                 |
| >Adhseq_+0585R | mel            | sequencing    | CCTTTGATCAACTTACCGCCA                |
| >Adhseq_+0728F | mel            | sequencing    | TGGATGTTGAGCCTCAGGTT                 |
| >Adhseq_+1209F | mel yak<br>san | sequencing    | AATGTTTCGATTTGACGGGCA                |
| >Adhseq_+1587F | mel            | sequencing    | CACCTATGAAGTCTATTTTAATCGCC           |
| >Adhseq_+1611R | mel            | sequencing    | GCGATTAATAAGACTTCATAGGTGG            |
| >Adhseq_+2092R | mel            | sequencing    | TATATGCGCAGAAAACCGGC                 |
| >Adhseq_+2219F | mel yak<br>san | sequencing    | CTGTGATGGCGGTTTGTGT                  |
| >AdhSeq_+2381R | mel            | sequencing    | TCCGATCTCTCGATGGCATT                 |
| >Adhseq_+2807F | mel            | sequencing    | GTCAAAACCAGGTTAGGGAGG                |
| >Adhseq_+2937R | mel            | sequencing    | CTTAATGTACACCCCAACAGCCTA             |
| >Adhseq_+3206F | mel            | sequencing    | CGAATGCATGTCGAAATTTTGC               |
| >Adhseq_+3600R | mel            | sequencing    | CCACAACCTACCCACCATA                  |
| >Adhseq_+3710F | mel yak<br>san | sequencing    | TCATCGGACATTGAGGACCC                 |
| >Adhseq_+4108R | mel yak<br>san | sequencing    | GCACTGCCTCTCCATTTTG                  |
| >Adhseq_+4203F | mel            | sequencing    | ATTCTGGGCCGGTAATTGAC                 |
| >AdhSeq-2228R  | mel            | sequencing    | TTGGGGTTCGCATCGAG                    |
| >AdhSeq-2274R  | mel            | sequencing    | CTTGGGGAATGCATGATTGG                 |
| >AdhSeq-2483F  | mel            | sequencing    | AGATGTTAGGCACGTCTGCTGAT              |
| >AdhSeq-2626F  | mel            | sequencing    | TAAATTCCTTTGACGCATGCAC               |
| >ame_bam_R1    | ame            | recombination | AAATGTTGACCAATGTCGGCTAGGATCC         |
| >ame_S27_F     | ame            | sequencing    | CGTCCAAATGTTACTGCACTCG               |
| >ame_S28_R     | ame            | sequencing    | CCGACCAAAAATAAAATATTCCC              |
| >as0.1F        | ame            | sequencing    | CCACATGAATTCCGAACGAGTC               |
| >as0.2R        | ame            | sequencing    | TTAAGACAGAAATCAAACGGCTCT             |
| >as0.3F        | ame            | sequencing    | TTTTGTTCCACTACCATATTGAACC            |
| >as0.4F        | ame            | sequencing    | ACATTGCTGTAAAGACTTTTTAATTGAG         |
| >as0.5R        | ame            | sequencing    | TCTGCCGAGTAGGGCGTTC                  |
| >eoAAswap_cf1  | ere ore        | recombination | CCATTGCCGAGACCAGCAAGCTGCTGAAG<br>ACC |
| >eoAAswap_IR1  | ere ore        | recombination | GGTCTTCAGCAGCTTGCTGGTCTCGGCAAT<br>GG |

|              |                    |               |                                                  |
|--------------|--------------------|---------------|--------------------------------------------------|
| >eost1_R1    | ere ore            | recombination | GCTAGCCGGTCTGCTGAACTGCAACTGAC                    |
| >eost2_F1    | ere ore            | recombination | GGCATTACCTTGACCAACAAGAACGTCAT<br>TTTCG           |
| >eost2_R1    | ere ore            | recombination | CGAAAATGACGTTCTTGTGGTCAAGGTGA<br>ATGCC           |
| >eost3_F1    | ere ore            | recombination | TGGAGCAAGCACTGGGACTCCGGCATCTA<br>A               |
| >eost3_R1    | ere ore            | recombination | TTAGATGCCGGAGTCCCAGTGCTTGCTCCA                   |
| >eost4_F1    | ere ore            | recombination | AGCTCTCCATGAGAAGTATGGAAAACTA<br>TATGAAAATTGAGA   |
| >eost4_R1    | ere ore            | recombination | TCTCAATTTTCATATAGTTTTTCCATACTTC<br>TCATGGAGAGCT  |
| >eostU_nheF1 | ere ore            | recombination | GTCAGTTGCAGTTCAGCAGACCGGCTAGC                    |
| >eostU_pacR1 | ere ore            | recombination | TCCAGCCACTCCCATTATCTATTTTAATTA<br>AGTAGAGGG      |
| >eostU_xhoF1 | ere ore            | recombination | CATTATTGTATTTAGTTCATATCAGCACTA<br>AAACTAAACTCGAG |
| >ere0164F    | ere ore            | sequencing    | CGAAGTGAGAGGTAACAATATTTGG                        |
| >ere0419F    | ere ore<br>yak san | sequencing    | AGATTGCCAAATGGGTCAAA                             |
| >ere0446R    | ere ore            | sequencing    | CTGACCCATTTGACCCATTT                             |
| >ere0637F    | ere ore            | sequencing    | TACATTAGCGGTAAGCTGCTTAGAC                        |
| >ere0771R    | ere ore            | sequencing    | TACTCGCCAGCATTGAGATG                             |
| >ere1006F    | ere ore            | sequencing    | TGCGTAGGCTGAACACACTT                             |
| >ere1115F    | ere ore            | sequencing    | TCGGGAACATTATCACCAAAAG                           |
| >ere1211R    | ere ore            | sequencing    | GTTTCTTGTTTGCTTCGCACC                            |
| >ere1345R    | ere ore<br>yak san | sequencing    | AACGTCTTCTTGCTGCTTGG                             |
| >ere1350R    | ere ore            | sequencing    | TCCTTATCAGCAAACGTGCCT                            |
| >ere1433F    | ere ore            | sequencing    | TGGAAGCGCGAACAGTCATA                             |
| >ere1539F    | ere ore            | sequencing    | TTATTGATTGGGGAAAATGTTG                           |
| >ere1576F    | ere ore            | sequencing    | CACTCCCAAGTGACCGTAT                              |
| >ere1610R    | ere ore            | sequencing    | TAGTCCAAATATGGTATACGGTCACTT                      |
| >ere1773F    | ere ore            | sequencing    | TTCCAATTAGGTGAAACAATTCGTA                        |
| >ere1877R    | ere ore            | sequencing    | TGATGAGAAGGAAAGAGATAAGC                          |
| >ere1915R    | ere ore<br>yak san | sequencing    | TGCAAGGGCAATAGCACATA                             |
| >ere1998R    | ere ore            | sequencing    | ACGCCTTAGAACTAATTGGCAA                           |
| >ere2249F    | ere ore            | sequencing    | GGGTTAAGTCGAGCTGCATT                             |
| >ere2250R    | ere ore            | sequencing    | CCATGTTTCGCATAGCAGATTCA                          |
| >ere2285F    | ere ore            | sequencing    | GCTGCATTGAAACCGCTACT                             |
| >ere2374F    | ere ore            | sequencing    | CAACATTTCTAGATTGATTCTACTACGC                     |
| >ere2594F    | ere ore            | sequencing    | GCGTTCTGACTCGGGT                                 |
| >ere2597R    | ere ore            | sequencing    | GTGTAGGACCCGAGTCAGA                              |
| >ere2814F    | ere ore            | sequencing    | TCTCAGTGCCTTCTGGTG                               |
| >ere2960R    | ere ore            | sequencing    | GGGCGAGTGCAGTTGACG                               |
| >ere3006R    | ere ore            | sequencing    | TTGCACAGCTCCTTAAATACCG                           |



|           |                    |                              |                             |
|-----------|--------------------|------------------------------|-----------------------------|
| >ere3022R | ere ore            | sequencing                   | GACAACTGCACTGAGACAATAATCG   |
| >ere3170R | ere ore            | sequencing                   | TGCGCTGTCTAACACTGGTT        |
| >ere3209F | ere ore            | sequencing                   | AAAGCGGCACAAGCAGTGT         |
| >ere3264F | ere ore            | sequencing                   | CCGTGCCGAATATTTGACTT        |
| >ere3392R | ere ore            | sequencing                   | TGGAAAATTACTGCTCGTCTGC      |
| >ere3603R | ere ore            | sequencing                   | CATTACGCGATCTCGGCTAT        |
| >ere3741F | ere ore            | sequencing                   | CAACATGGCATTACCTTGA         |
| >ere3765F | ere ore            | sequencing                   | CAAGAACGTCATTTTCGTGGC       |
| >ere3853R | ere ore            | sequencing                   | GCCTACTTACCTTCAGATCACGC     |
| >ere4032F | ere ore            | sequencing                   | TGCCCATGCCGAGACC            |
| >ere4091R | ere ore<br>yak san | sequencing                   | AGTCCGTTGATCAGGACAT         |
| >ere4217F | ere ore<br>yak san | amplify locus,<br>sequencing | CAACATTGGATCCGTGACTG        |
| >ere4251F | ere ore            | sequencing                   | TACCAGGTGCCCGTCTACTC        |
| >ere4388R | ere ore            | sequencing                   | CAGTTTCTAGAGGTGTCATTGAGGA   |
| >ere4433R | ere ore            | sequencing                   | GGTGGTGCGGGTGATGC           |
| >ere4599R | ere ore<br>yak san | sequencing                   | CCAGGTCCAGTTTCCAGATG        |
| >ere4711F | ere ore<br>yak san | amplify locus,<br>sequencing | ATTCACGCAAGGCAATAAGG        |
| >ere4983F | ere ore            | sequencing                   | CTGCTATGTGGCGGATTGC         |
| >ere5055R | ere ore<br>yak san | amplify locus,<br>sequencing | CACCGCTATGTTCTTGGTCA        |
| >ere5221F | ere ore            | sequencing                   | GTTCAAGGACTTTGCACTTTCG      |
| >ere5366R | ere ore            | sequencing                   | TGGTGGTTTAATAACGAATCTTCTATG |
| >ere5461F | ere ore            | sequencing                   | CACGGGGGAGTTGCTATTTA        |
| >ere5515R | ere ore            | sequencing                   | AAGGGCAAACTGTTAAAAATGG      |
| >ere5561F | ere ore<br>yak san | sequencing                   | GCACAGCTGCAGTCGATAAA        |
| >ere5715F | ere ore            | sequencing                   | ATGGAGCCACGTTGTGCG          |
| >ere5809R | ere ore            | sequencing                   | TCCTCCATTTTTCTGTCCA         |
| >ere5884R | ere ore<br>yak san | sequencing                   | TGCACTATAGGCGCAGAAAA        |
| >ere5889F | ere ore            | sequencing                   | AGTTCGGTGTGATTGGCTTT        |
| >ere5908R | ere ore<br>yak san | sequencing                   | AAAGCCAATCACACCGAACT        |
| >ere6107F | ere ore            | sequencing                   | CCTTTGCCGACCGCCTG           |
| >ere6225R | ere ore            | sequencing                   | TGCAACTTGACCAACTCCAG        |
| >ere6270F | ere ore            | sequencing                   | GCAATGATGAAGACGACCAA        |
| >ere6407R | ere ore            | sequencing                   | TGCATACTTTTGGGCACGC         |
| >ere6408F | ere ore<br>yak san | sequencing                   | CCCAAAGTATGCAGCGAAT         |
| >ere6472F | ere ore            | sequencing                   | GTTCTATATGATTCCGTGTTGTGGT   |
| >ere6596F | ere ore            | sequencing                   | GTCAAGTCCAAC TACCCAAGGC     |
| >ere6622R | ere ore            | sequencing                   | CGGCAGACAACGAATATTGA        |
| >ere6747R | ere ore            | sequencing                   | TATGGCTGACTGGCTGACTG        |

|                |                    |               |                                                                                     |
|----------------|--------------------|---------------|-------------------------------------------------------------------------------------|
| >ere6803F      | ere ore<br>yak san | sequencing    | ACATTGCCCCAGGAATATTGG                                                               |
| >ere6910F      | ere ore            | sequencing    | CAAGAGCCCTAGCTGGAAAA                                                                |
| >ere6914R      | ere ore            | sequencing    | TCTTGCGTTGGATTAGTACCGA                                                              |
| >ere6927R      | ere ore            | sequencing    | GCTGAGCTGAAAGCTTTTCCA                                                               |
| >ere7070R      | ere ore            | sequencing    | CACAACTCACCCACCATATAGC                                                              |
| >ere7090F      | ere ore            | sequencing    | CAGCTATATGGTGGGGTGAGTTG                                                             |
| >ere7170F      | ere ore            | sequencing    | AGCCAGCAGACCAAAAAGAG                                                                |
| >ere7260R      | ere ore<br>yak san | sequencing    | GATTCCACTCCATGCGATTC                                                                |
| >ere7284R      | ere ore            | sequencing    | GGAGTGGGTACTCTGGAAAAATG                                                             |
| >ere7298F      | ere ore            | sequencing    | ACTCCCTGCCATCTGCTGC                                                                 |
| >ere7320R      | ere ore            | sequencing    | GGAAAGCAAACCTTGCAACGG                                                               |
| >ere7520R      | ere ore<br>yak san | sequencing    | TTAATCAAGCGTGTGCCAAA                                                                |
| >ere7587F      | ere ore<br>yak san | sequencing    | AGGGCACAATAGCCAAAATG                                                                |
| >ere7834R      | ere ore            | sequencing    | ACTTACCATTTACGAGTACACCTACAAC                                                        |
| >melst_-0183F  | mel                | recombination | CCTGCGTACATAGCCGAGATC                                                               |
| >melst_-0183R  | mel                | recombination | GATCTCGGCTATGTACGCAGG                                                               |
| >melst_-0301F  | mel                | recombination | GAATACTAATATAGAAAAAGCTTTGCCG                                                        |
| >melst_-0301R  | mel                | recombination | CGGCAAAGCTTTTTCTATATTAGTATTC                                                        |
| >melst_-0408F  | mel                | recombination | ACTCGTCCCTGTTAATCGGC                                                                |
| >ore6486R      | ore                | sequencing    | GTAAATACTACCACAACACGGAAT                                                            |
| >oreAAswap_cR1 | ere ore            | recombination | GATGGCACCGTTCTCGTTCAGCTCAATGGC<br>CTTGACAAAGTTCTCGGCGCAGGaCAACGA<br>GgTCTGGGTGGGATG |
| >oreAAswap_rF1 | ere ore            | recombination | CCATTGAGCTGAACGAGAACGGTGCCATCT<br>GGAAACTGGACTTGGGCACCCTGGAGGCC<br>ATCcAGTGGAGCAAGC |
| >sanAAswap1F   | yak san            | recombination | GAAGTCATCATGGCGTTTACCTTGACCAAC<br>AAG                                               |
| >sanAAswap1R   | yak san            | recombination | CTTGTTGGTCAAGGTAAACGCCATGATGAC<br>TTC                                               |
| >sanAAswap2F   | yak san            | recombination | TCGCCGAGCTGAAGGCAATCAATCCAAAG                                                       |
| >sanAAswap2R   | yak san            | recombination | CTTTGGATTGATTGCCTTCAGCTCGGCGA                                                       |
| >sanAAswap3F   | yak san            | recombination | CGTTGGCCTGCGCCCAGAACTTTGTGAAG                                                       |
| >sanAAswap3R   | yak san            | recombination | CTTCACAAAGTTCTGGGCGCAGGCCAACG                                                       |
| >va_S01_R      | vir ame            | sequencing    | ACTGATGACTTTTGGTTTAAGTATTTCTA                                                       |
| >va_S02_R      | vir ame            | sequencing    | CAGCCGAACGGCATTGATT                                                                 |
| >va_S03_F      | vir ame            | sequencing    | TACACAAGAGCATTACATTACCTAGACAC                                                       |
| >va_S04_F      | vir ame            | sequencing    | ATAGCTGCGCATGCATGATA                                                                |
| >va_S05_R      | vir ame            | sequencing    | CGTGTGCTTTGTGTGTTGGTAGA                                                             |
| >va_S06_F      | vir ame            | sequencing    | CGGCAAGGGAACACTAAAAA                                                                |
| >va_S07_R      | vir ame            | sequencing    | GACAATCTCCCAGCTGGTGT                                                                |
| >va_S08_F      | vir ame            | sequencing    | TTGCCAAGCTGAAGACTGTG                                                                |
| >va_S09_R      | vir ame            | sequencing    | GATCGTCCAAAATGCCAGC                                                                 |

|               |         |               |                                                               |
|---------------|---------|---------------|---------------------------------------------------------------|
| >va_S10_F     | vir ame | sequencing    | TGGGCGAGCTACTTCTTGAG                                          |
| >va_S11_R     | vir ame | sequencing    | GCCTCAATGGCCTTAACAAA                                          |
| >va_S12_F     | vir ame | sequencing    | AAATGTGGTTGGTTGCTTTTCA                                        |
| >va_S13_R     | vir ame | sequencing    | TGGAGTAATCGAATTTGCAACG                                        |
| >va_S14_F     | vir ame | sequencing    | AATAAAATCTTCTTTTGCAGGTTAC                                     |
| >va_S15_R     | vir ame | sequencing    | AACCTGCAAAAGGAAGATTTTATTAC                                    |
| >va_S16_F     | vir ame | sequencing    | GAGCATTTATTATTCAAGCAAGAT                                      |
| >va_S17_R     | vir ame | sequencing    | TATCTTGCTTGAATAATAAATGCTC                                     |
| >va_S18_F     | vir ame | sequencing    | TAGACATAGGTCAACATTTCCGATT                                     |
| >va_S19_R     | vir ame | sequencing    | AATCGGAAATGTTGACCTATGTCT                                      |
| >va_S20_F     | vir ame | sequencing    | CCAATCAAAAGTTGCGTGTG                                          |
| >va_S21_R     | vir ame | sequencing    | CACACGCAACTTTTGATTGG                                          |
| >va_S22_F     | vir ame | sequencing    | AAATGGCGTATACCGCAAAA                                          |
| >va_S23_R     | vir ame | sequencing    | CAGCAGAAGCCAGCAAACG                                           |
| >va_S24_R     | vir ame | sequencing    | GCTGTGCTTGTGTTCTTG                                            |
| >va_S25_F     | vir ame | sequencing    | GATACGGATGGATTTGCTACGA                                        |
| >va_S30_F     | vir ame | sequencing    | GCCGACGAGTTGCCAATG                                            |
| >va_S31_R     | vir ame | sequencing    | GACTCAATCCGCTTGTCTGTG                                         |
| >va_S32_F     | vir ame | sequencing    | GTCACACCTCTGGGATGTCAAT                                        |
| >vasti_1F     | vir ame | recombination | CTTGTTATTATTAATAGTTATTGGTTTCATT<br>TT                         |
| >vasti_1R     | vir ame | recombination | AAAATGAAACCAATAACTATTAATAATAA<br>CAAG                         |
| >vasti_2F     | vir ame | recombination | TTAATCAATGCCGTTCCGGCTGAGACAGT                                 |
| >vasti_2R     | vir ame | recombination | ACTGTCTCAGCCGAACGGCATTGATTAA                                  |
| >vasti_4F     | vir ame | recombination | AGGATGGCGATCGCTAACAGAACATTAT<br>C                             |
| >vasti_4R     | vir ame | recombination | GATAATGTTCTTGTTAGCGATCGCCATCCT                                |
| >vasti_5F     | vir ame | recombination | ACCATTCAAATCCGAGCAAGGAGCATCTG                                 |
| >vasti_5R     | vir ame | recombination | CAGATGCTCCTTGCTCGGATTTGAATGGT                                 |
| >vasti_a3F    | vir ame | recombination | AGTGTCAATCAGCACAGTGAATCAGGC                                   |
| >vasti_a6F    | vir ame | recombination | AATCTGATTTAATGAATTAATGAAGTTTGT<br>ATTACATATAAGCTGATTG         |
| >vasti_v3R    | vir ame | recombination | acactgtgctgattgacactGTTCTCTATGCGAGTGGC<br>CCCTTAAACT          |
| >vasti_v6R    | vir ame | recombination | atacaaactcatTAATTCATTAATCAGATTTTAA<br>TTTTTTGGTTATATTCAGAATCC |
| >vir_S26_F    | vir     | sequencing    | ACTAGAAGTCCGTGTCAGGAATCTAA                                    |
| >vir_S29_R    | vir     | sequencing    | GTACACTGATTTCATAAGAGACATACATCC                                |
| >virAAswap-F1 | vir ame | recombination | GCTGAAGGCACTCAACCCAAAGGTG                                     |
| >virAAswap-R1 | vir ame | recombination | CACCTTTGGGTTGAGTGCCTTCAGC                                     |
| >YSsti1F      | yak san | recombination | CGATTATTGTCTCAGTGCAGTTGTCAGTTG<br>CAG                         |
| >YSsti1R      | yak san | recombination | CTGCAACTGACAACCTGCACTGAGACAATA<br>ATCG                        |
| >YSsti2F      | yak san | recombination | AGAGCCTGCTCAAGCAAAAAGAAGTCATC<br>ATGG                         |

|               |         |               |                                            |
|---------------|---------|---------------|--------------------------------------------|
| >YSsti2R      | yak san | recombination | CCATGATGACTTCTTTTTGCTTGAGCAGGC<br>TCT      |
| >YSsti3F      | yak san | recombination | CAGTGGTCCAAGCACTGGGACTCC                   |
| >YSsti3R      | yak san | recombination | GGAGTCCCAGTGCTTGGACCACTG                   |
| >YSsti4F      | yak san | recombination | GAGAAATCCAAAATAGTGATAAGCCGCCT<br>GCC       |
| >YSsti4R      | yak san | recombination | GGCAGGCGGCTTATCACTATTTTGGATTTC<br>TC       |
| >ysstiU_nheF1 | yak san | recombination | GGAGCGTAGGTTAAATACCCTGGCTAGCA<br>AG        |
| >YSstiU_pacR1 | yak san | recombination | CCAGCCACTCCCACTTATCTATTTTAATTA<br>ATTTAGCC |

### SI References

1. Hansen SK, Tjian R. (1995) TAFs and TFIIA Mediate Differential Utilization of the Tandem *Adh* Promoters. *Cell* 82: 565-575
2. Laurie CC, Stam L. (1994) The Effect of an Intronic Polymorphism on Alcohol Dehydrogenase Expression in *Drosophila melanogaster*. *Genetics* 138: 379-385
3. Heberlein U, England B, Tjian R. (1985) Characterization of *Drosophila* Transcription Factors That Activate the Tandem Promoters of the Alcohol Dehydrogenase Gene. *Cell* 41: 965-977
4. Choudhary M, Laurie CC. (1991) Use of *in vitro* Mutagenesis to Analyze the Molecular Basis of the Difference in *Adh* Expression Associated With the Allozyme Polymorphism in *Drosophila melanogaster*. *Genetics* 129: 481-488
5. Siddiq MA, Loehlin DW, Montooth KL, Thornton JW. (2017b) Experimental test and refutation of a classic case of molecular adaptation in *Drosophila melanogaster*. *Nature Ecology and Evolution* 1, 0025 DOI: 10.1038/s41559-016-0025
6. Stam LF, Laurie CC. (1996) Molecular Dissection of a Major Gene Effect on a Quantitative Trait: The Level of Alcohol Dehydrogenase Expression in *Drosophila melanogaster*. *Genetics* 144: 1559-1564
7. Loehlin DW, Carroll SB. (2016) Expression of tandem gene duplicates is often greater than twofold. *Proc. Natl Acad. Sci. USA* 113, 5988–5992 DOI: 10.1073/pnas.1605886113
8. Chakraborty M, Fry JD. (2016) Evidence that Environmental Heterogeneity Maintains a Detoxifying Enzyme Polymorphism in *Drosophila melanogaster*. *Current Biology* 26: 219-223 DOI: 10.1016/j.cub.2015.11.049
9. Corbin V, Maniatis T. (1990) Identification of cis-Regulatory Elements Required for Larval Expression of the *Drosophila melanogaster* Alcohol Dehydrogenase Gene. *Genetics* 124: 637-646
10. Ashburner M. (1998) Speculations on the subject of alcohol dehydrogenase and its properties in *Drosophila* and other flies. *Bioessays* 20: 949-954

11. Vo ngoc L, Wang YL, Kassavetis GA, Kadonaga JT. (2017) The punctilious RNA polymerase II core promoter. *Genes and Development* 31: 1289-1301 DOI: 10.1101/gad.303149.117
12. Hoskins RA, Carlson JW, Kennedy C, Acevedo D, Evans-Holm M, Frise E, Wan KH, Park S, Mendez-Lago M, Rossi F, Villasante A, Dimitri P, Karpen GH, Celniker SE. (2007) Sequence finishing and mapping of *Drosophila melanogaster* heterochromatin. *Science* 316: 1625-1628
13. Gramates LS, Marygold SJ, dos Santos G, Urbano J-M, Antonazzo G, Matthews BB, Rey AJ, Tabone CJ, Crosby MA, Emmert DB, Falls K, Goodman JL, Hu Y, Ponting L, Schroeder AJ, Strelets VB, Thurmond J, Zhou P and the FlyBase Consortium. (2017) FlyBase at 25: looking to the future. *Nucleic Acids Research* 45(D1):D663-D671 DOI: 10.1093/nar/gkw1016
14. Nurminsky DI, Moriyama EN, Lozovskaya ER, Hartl DL. (1996) Molecular phylogeny and genome evolution in the *Drosophila virilis* species group: Duplications of the alcohol dehydrogenase gene. *Mol Biol Evol* 13(1):132–149.
15. R Core Team (2017). R: A language and environment for statistical computing. R Foundation for Statistical Computing, Vienna, Austria. URL <https://www.R-project.org/>
16. Galecki A, Burzykowski T. (2013) Linear Mixed-Effects Models Using R: A Step-By-Step Approach (Springer, New York), pp 478–480.
17. Venables WN, Ripley BD. (2002) Modern Applied Statistics with S. Fourth Edition. (Springer, New York), p. 193
18. Hansen SK, Tjian R. (1995) TAFs and TFIIA Mediate Differential Utilization of the Tandem *Adh* Promoters. *Cell* 82: 565-575
